# Supplementary material for: Mining Predicted Essential Genes of Brugia malayi for Nematode Drug Targets
Source: PubMed Central journal article supplement (PMC2063515; doi:10.1371/journal.pone.0001189), 2007-11-14
Supplement: pone.0001189.s001.pdf [file pone.0001189.s001.pdf]

**Supplementary Table S1. Ranked list of candidate targets.**

| Score | TIGR<br><i>B.malayi</i> pub<br>locus | <i>B. malayi</i> gene description                                                                                                                                                                           | <i>C. elegans</i><br>ortholog | <i>C. elegans</i> ortholog RNAi<br>phenotypes                              |
|-------|--------------------------------------|-------------------------------------------------------------------------------------------------------------------------------------------------------------------------------------------------------------|-------------------------------|----------------------------------------------------------------------------|
| 275   | <b>Bm1_35120</b>                     | PAN domain containing protein                                                                                                                                                                               | <i>noah-2</i>                 | Lva, Sck, Emb, Lvl, Unc, Ste, WT                                           |
| 248   | <b>Bm1_36170</b>                     | PAN domain containing protein                                                                                                                                                                               | <i>noah-1</i>                 | Bmd, Lva, Muv, Emb, Lvl, Unc, WT                                           |
| 248   | Bm1_45135                            | Conserved hypothetical protein, putative                                                                                                                                                                    | <i>pqn-83</i>                 | Let, Unc, Ste                                                              |
| 179   | <b>Bm1_35215</b>                     | chitin synthase 1, chs-1                                                                                                                                                                                    | <i>chs-1</i>                  | Emb, Ste, Sterility/Impaired Fertility in F0, Gro, WT                      |
| 172   | Bm1_36850                            | hypothetical protein                                                                                                                                                                                        | C01B10.11                     | Dpy, Unc                                                                   |
| 172   | <b>Bm1_22725</b>                     | RNA dependent RNA polymerase family protein                                                                                                                                                                 | <i>ego-1</i>                  | Cyk, Emb, WT, Gro                                                          |
| 157   | Bm1_15245                            | RH17657p-related                                                                                                                                                                                            | C25H3.9                       | General Pace of Development abnormal, Emb                                  |
| 157   | Bm1_43465                            | Temporarily assigned gene name protein 40, putative                                                                                                                                                         | <i>nrf-6</i>                  | Dpy, Bmd, Slu, Emb, WT                                                     |
| 154   | Bm1_38120                            | hypothetical protein                                                                                                                                                                                        | W04G3.8                       | Prz, Lvl, Unc, WT, Larval Lethal-Early (L1/L2), Gro                        |
| 151   | Bm1_35395                            | Acyltransferase family protein                                                                                                                                                                              | T14D7.2                       | Egl, Pvl, Unc, WT                                                          |
| 143   | Bm1_36765                            | SD01790p-related                                                                                                                                                                                            | Y41E3.1                       | Sck, Ste, WT                                                               |
| 141   | Bm1_25640                            | hypothetical protein                                                                                                                                                                                        | ZC247.1                       | Sck, Ste, Sma, WT, Stp, Gro                                                |
| 140   | <b>Bm1_35480</b>                     | hypothetical protein                                                                                                                                                                                        | <i>mlt-8</i>                  | Bmd, Prz, Lva, Larval Arrest-Early (L1/L2), Lvl, Unc, WT                   |
| 133   | Bm1_49915                            | conserved hypothetical protein                                                                                                                                                                              | K07A12.7                      | Emb, WT                                                                    |
| 125   | Bm1_45670                            | WH2 motif family protein                                                                                                                                                                                    | C34E10.11                     | Emb, WT                                                                    |
| 123   | <b>Bm1_37495</b>                     | conserved hypothetical protein                                                                                                                                                                              | <i>mlt-9</i>                  | Prz, Larval Lethal-Late (L3/L4), Unclassified, Mlt, Unc, Lva, Sck, Gro, WT |
| 119   | Bm1_46940                            | hypothetical protein                                                                                                                                                                                        | C52A11.2                      | Dpy, Lva, Egl, Emb, Unc, Rup, WT                                           |
| 116   | Bm1_38110                            | hypothetical protein                                                                                                                                                                                        | W04G3.2                       | Bmd, Lva, Lvl, Unc, WT                                                     |
| 115   | Bm1_32730                            | LBP / BPI / CETP family, C-terminal domain containing protein                                                                                                                                               | C06G1.1                       | Lon, Unc, WT                                                               |
| 114   | Bm1_42470                            | hypothetical protein (contains similarity to <i>Aedes aegypti</i> Putative mitochondrial NADH-ubiquinone oxidoreductase (MitochondrialsNADH:ubiquinone oxidoreductase B14.7 subunit, putative).; TR:Q1HQR1) | B0491.5                       | Bmd, Lva, Emb, Unclassified, Lvl, WT                                       |

|     |                  |                                                                                              |               |                                                          |
|-----|------------------|----------------------------------------------------------------------------------------------|---------------|----------------------------------------------------------|
| 112 | Bm1_55705        | Conserved hypothetical protein, putative                                                     | B0205.11      | Emb, WT                                                  |
| 110 | Bm1_38105        | hypothetical protein                                                                         | W04G3.3       | Unc, WT                                                  |
| 108 | Bm1_38425        | 3'-5' exonuclease family protein                                                             | C10G6.1       | Mlt, Unc, Rup, WT                                        |
| 107 | Bm1_43740        | conserved hypothetical protein                                                               | T14D7.2       | Egl, Pvl, Unc, WT                                        |
| 107 | Bm1_19285        | Innexin family protein                                                                       | <i>inx-4</i>  | Unclassified, WT                                         |
| 106 | Bm1_51995        | LBP / BPI / CETP family, C-terminal domain containing protein                                | F44A2.3       | Spindle Elongation/Integrity abnormal, Emb, WT           |
| 105 | <b>Bm1_38160</b> | Fatty acid desaturase family protein                                                         | <i>fat-2</i>  | Emb, Unclassified, WT                                    |
| 105 | Bm1_02135        | ribosomal protein L9 domain containing protein                                               | B0205.11      | Emb, WT                                                  |
| 103 | Bm1_03880        | hypothetical protein                                                                         | Y71G12B.13    | Emb, WT                                                  |
| 100 | Bm1_35075        | Innexin <i>inx-3</i> , putative                                                              | <i>inx-3</i>  | Lva, Unc, Gro, WT                                        |
| 99  | Bm1_31660        | hypothetical protein                                                                         | C55C3.5       | Osmotic Integrity defective, Ooc, Emb                    |
| 98  | <b>Bm1_02195</b> | hypothetical protein                                                                         | <i>mlt-8</i>  | Bmd, Prz, Lva, Larval Arrest-Early (L1/L2), Lvl, Unc, WT |
| 98  | Bm1_09270        | Skp1 related (ubiquitin ligase complex component) protein 18-like                            | <i>skr-18</i> | Pvl, Unc, Rup, Stp, Gro, WT                              |
| 97  | Bm1_50630        | hypothetical protein                                                                         | T19B10.2      | Prz, Rup, Unc, WT, Gro                                   |
| 96  | <b>Bm1_08695</b> | trehalose-6-phosphate synthase-related                                                       | <i>gob-1</i>  | Slu, Larval Arrest-Late (L3/L4), Gro, WT                 |
| 96  | Bm1_39265        | GH05862p-related amine oxidase, flavin-containing-related (putative UDP galactopyranomutase) | F42G8.10      | Lva, Emb, Unclassified, WT                               |
| 91  | <b>Bm1_34455</b> | hypothetical protein (immunoGlobulin-like Cell adhesion Molecule family)                     | H04M03.4      | Prz, Dpy, Lvl, Unclassified, Sma, Unc, WT                |
| 88  | Bm1_08915        | symbol-related                                                                               | <i>igcm-3</i> | Unclassified, WT                                         |
| 84  | Bm1_16245        | symbol-related                                                                               | ZK809.3       | Lva, Emb, Unclassified, WT, Gro                          |
| 82  | Bm1_33575        | hypothetical protein                                                                         | ZK899.2       | Lva, Emb, Lvl, WT, Larval Lethal-Early (L1/L2), Gro      |
| 82  | Bm1_39790        | conserved hypothetical protein                                                               | W01C8.5       | Unclassified, Gro, WT                                    |
| 81  | Bm1_33440        | Innexin family protein                                                                       | <i>inx-13</i> | Unc, Rup, Stp, Gro, WT                                   |
| 81  | Bm1_41495        | Gex interacting protein protein 4, isoform c-related                                         | <i>gei-4</i>  | Let, Sck, Emb, Pvl, Ste, WT                              |
| 79  | Bm1_55030        | hypothetical protein                                                                         | Y67H2A.5      | Let, Sck, Emb, Ste, WT                                   |
| 79  | Bm1_07680        | EB module family protein                                                                     | F56B3.2       | Prz, Lvl, Unclassified, Unc, WT, Gro                     |
| 77  | Bm1_30085        | Apoptosis regulator proteins, Bcl-2 family protein                                           | <i>ced-9</i>  | Integrity of Membranous Organelles defective, Emb, WT    |
| 77  | Bm1_56645        | Hypothetical 19.4 kDa protein                                                                | T09A5.5       | Lva, Clr, Emb, Unclassified, WT                          |
| 77  | Bm1_56645        | T09A5.5 in chromosome III, putative                                                          | T09A5.5       | Lva, Clr, Emb, Unclassified, WT                          |
| 75  | Bm1_49050        | hypothetical protein                                                                         | ZC328.1       | Prz, Dpy, Prl, Lvl, Unc, WT, Gro                         |

|    |                  |                                                                              |               |                                                                      |
|----|------------------|------------------------------------------------------------------------------|---------------|----------------------------------------------------------------------|
| 75 | Bm1_49335        | RUN domain containing protein                                                | <i>unc-14</i> | Unc, WT                                                              |
| 74 | Bm1_05470        | hypothetical protein                                                         | F37C4.4       | Emb, WT, Stp                                                         |
| 74 | Bm1_53115        | hypothetical protein                                                         | C41G7.3       | Him, General Pace of Development abnormal, WT                        |
| 74 | Bm1_41565        | hAT family dimerisation domain containing protein                            | F42H10.5      | Emb, WT                                                              |
| 73 | Bm1_56145        | conserved hypothetical protein                                               | <i>mdt-15</i> | Clr, Emb, Unc, Ste, Lva, Sck, Adl, WT, Developmental Delay, Gro      |
| 72 | <b>Bm1_51960</b> | conserved hypothetical protein (putative UDP galactopyranomutase)            | H04M03.4      | Prz, Dpy, Lvl, Unclassified, Sma, Unc, WT                            |
| 72 | Bm1_44220        | conserved hypothetical protein                                               | C25H3.6       | Bmd, Lva, Emb, Unc, WT                                               |
| 71 | Bm1_05960        | Patched family protein                                                       | <i>ptr-23</i> | Unc, WT                                                              |
| 71 | Bm1_24555        | hypothetical protein                                                         | F28F8.5       | Slu, Emb, Pvl, Unc, Rup, Gro, Stp, WT                                |
| 71 | Bm1_16555        | hypothetical protein                                                         | <i>atp-5</i>  | Lva, General Pace of Development abnormal, Emb, Ste, Gro             |
| 70 | Bm1_35415        | 50S ribosomal protein L20.-related                                           | Y48C3A.10     | Emb, Unclassified, WT                                                |
| 69 | Bm1_52630        | Lipase family protein                                                        | T08B1.4       | Aldicarb resistant, WT                                               |
| 68 | Bm1_21610        | PDZ domain containing protein                                                | T21G5.4       | Lva, Pvl, WT, Stp                                                    |
| 68 | Bm1_45560        | hypothetical protein                                                         | C09F5.1       | Pvl, Ste, WT                                                         |
| 67 | Bm1_14680        | PDZ domain containing protein                                                | T21G5.4       | Lva, Pvl, WT, Stp                                                    |
| 67 | Bm1_14330        | Mitochondrial ATP synthase coupling factor 6 family protein                  | <i>atp-4</i>  | General Pace of Development abnormal, Emb, Lvl, Ste, Adl, Gro        |
| 67 | Bm1_47700        | Mitochondrial import inner membrane translocase subunit Tim17 family protein | F15D3.7       | Emb, Pvl, Severe Pleiotropic Defects, Ste                            |
| 67 | Bm1_07635        | GM16138p-related                                                             | F49C12.12     | Osmotic Integrity defective, Emb, Sterile F0/Fertility Problems, Lvl |
| 67 | Bm1_53755        | NADH-ubiquinone oxidoreductase subunit B14.5b.-related                       | Y71H2AM.4     | Lva, Emb, WT, Gro                                                    |
| 67 | Bm1_45175        | conserved hypothetical protein                                               | ZC262.8       | Emb, WT                                                              |
| 66 | Bm1_37530        | conserved hypothetical protein                                               | <i>lin-14</i> | Egl, Pvl, Unc, Sma, Sck, Sterile F1, Stp, WT                         |
| 65 | Bm1_33125        | conserved hypothetical protein                                               | ZK1193.5      | Lva, Clr, Lvl, Larval Arrest-Late (L3/L4), Gro                       |
| 65 | Bm1_21620        | Profilin family protein                                                      | <i>pfn-1</i>  | Cyk, Emb, Unc, Stp                                                   |
| 65 | Bm1_18695        | Nematode cuticle collagen N-terminal domain containing protein               | <i>dpy-3</i>  | Dpy, Unc                                                             |
| 64 | Bm1_38065        | Clc-like                                                                     | Y38F2AL.1     | Dpy, Egl, Unc, WT                                                    |
| 64 | Bm1_25750        | Lipase family protein                                                        | F58G1.5       | Him, WT                                                              |
| 64 | Bm1_51095        | Innexin <i>inx-10</i> , putative                                             | <i>inx-10</i> | Aldicarb resistant, WT                                               |

|    |                  |                                                                              |                |                                                                                          |
|----|------------------|------------------------------------------------------------------------------|----------------|------------------------------------------------------------------------------------------|
| 64 | Bm1_51050        | hypothetical protein                                                         | <i>ril-1</i>   | Lva, General Pace of Development abnormal, Emb, Gro                                      |
| 64 | Bm1_44775        | hypothetical protein                                                         | C23G10.8       | Emb, Pvl, Ste, WT, Gro                                                                   |
| 63 | Bm1_32310        | Innexin family protein                                                       | <i>inx-3</i>   | Lva, Unc, Gro, WT                                                                        |
| 63 | Bm1_13015        | Nematode cuticle collagen N-terminal domain containing protein               | <i>dpy-5</i>   | Dpy, Rup                                                                                 |
| 63 | Bm1_44070        | Zinc finger, C2H2 type family protein                                        | <i>die-1</i>   | Bmd, Muv, Emb, Lvl, WT, Gro                                                              |
| 63 | Bm1_46095        | hypothetical protein                                                         | F57B10.14      | Osmotic Integrity defective, Emb, WT                                                     |
| 63 | Bm1_08035        | Hypothetical 36.0 kDa protein C45G9.5 in chromosome III.-related             | C45G9.5        | Lva, Integrity of Membranous Organelles defective, Emb, Larval Arrest-Early (L1/L2), Gro |
| 62 | Bm1_56805        | 50S ribosomal protein L10.-related                                           | K01C8.6        | Lva, Emb, Larval Arrest-Early (L1/L2), Unclassified, Sma, WT, Gro                        |
| 62 | Bm1_48395        | hypothetical protein                                                         | Y87G2A.1       | Unclassified, Pvl, Rup, Unc, Stp, Gro, WT                                                |
| 62 | Bm1_53205        | hypothetical protein                                                         | T19A5.3        | Lvl, WT                                                                                  |
| 61 | Bm1_41590        | Mitochondrial import inner membrane translocase subunit Tim17 family protein | F15D3.7        | Emb, Pvl, Severe Pleiotropic Defects, Ste                                                |
| 61 | Bm1_21255        | Chitin binding Peritrophin-A domain containing protein                       | H02I12.1       | Osmotic Integrity defective, Emb, Sterile F0/Fertility Problems, Ste                     |
| 60 | Bm1_05895        | Gex interacting protein protein 16, isoform d-related                        | <i>gei-16</i>  | Lva, Emb, Lvl, Gro, WT                                                                   |
| 60 | Bm1_42370        | hypothetical protein                                                         | T21B10.3       | Clr, Emb, Pvl, Unc, Rup, WT, Gro                                                         |
| 59 | Bm1_55805        | hypothetical protein                                                         | K11B4.1        | Lva, Emb, Unclassified, WT                                                               |
| 58 | <b>Bm1_03495</b> | Kunitz/Bovine pancreatic trypsin inhibitor domain containing protein         | <i>bli-5</i>   | Bli, Lvl, Unc, Adl, WT                                                                   |
| 58 | Bm1_10140        | Zinc finger, C2H2 type family protein                                        | ZK867.1        | Let, Egl, Unc, WT                                                                        |
| 58 | Bm1_21225        | hypothetical protein                                                         | F36A2.7        | Lva, General Pace of Development abnormal, Sle, Emb, Unclassified, Gro                   |
| 57 | Bm1_33565        | conserved hypothetical protein                                               | <i>zwl-1</i>   | Emb, WT                                                                                  |
| 57 | Bm1_55375        | carbamoyl-phosphate synthase, large subunit, putative                        | <i>pyr-1</i>   | Emb, Mlt, Lvl, Unc, WT, Gro                                                              |
| 57 | Bm1_56035        | hypothetical protein                                                         | <i>pry-1</i>   | Mig, WT                                                                                  |
| 57 | Bm1_37760        | Zinc finger, C2H2 type family protein                                        | <i>mep-1</i>   | Pvl, Lvl, Ste, WT, Stp, Gro                                                              |
| 55 | Bm1_43170        | Transmembrane amino acid transporter protein                                 | Y32F6A.4       | Unclassified, WT                                                                         |
| 55 | Bm1_37230        | conserved hypothetical protein                                               | Y11D7A.9       | Dpy, Egl, Clr, Lvl, Unclassified, Unc, Bmd, Lva, WT, Gro                                 |
| 54 | Bm1_09225        | HIT zinc finger family protein                                               | <i>tag-143</i> | WT, Developmental Delay                                                                  |

|    |                  |                                                                 |                |                                                       |
|----|------------------|-----------------------------------------------------------------|----------------|-------------------------------------------------------|
| 54 | Bm1_36315        | spliced leader 175 kDa protein, putative                        | T13F2.7        | Lva, Emb, Unclassified, WT, Gro                       |
| 53 | Bm1_08450        | hypothetical protein                                            | ZK1193.5       | Lva, Clr, Lvl, Larval Arrest-Late (L3/L4), Gro        |
| 53 | Bm1_41500        | conserved hypothetical protein                                  | <i>gei-4</i>   | Let, Sck, Emb, Pvl, Ste, WT                           |
| 52 | Bm1_42535        | Tudor domain containing protein                                 | <i>ekl-1</i>   | Spindle Elongation/Integrity abnormal, Emb, Abs, WT   |
| 52 | Bm1_51010        | hypothetical protein                                            | K03B4.1        | Lva, Emb, WT, Gro                                     |
| 52 | Bm1_36555        | collagen col-34 - <i>Caenorhabditis elegans</i> , putative      | <i>col-34</i>  | Dpy, Bmd, Unc, WT                                     |
| 51 | Bm1_33065        | hypothetical protein                                            | F46C8.7        | Unclassified, WT                                      |
| 51 | Bm1_29610        | hypothetical protein                                            | Y49G5B.1       | Emb, WT                                               |
| 51 | Bm1_54230        | zgc:101038 protein-related                                      | Y69A2AR.21     | Emb, WT                                               |
| 51 | Bm1_39200        | hypothetical protein                                            | <i>pes-8</i>   | Prz, Egl, Ste, Adl, WT, Stp                           |
| 51 | Bm1_27205        | hypothetical protein                                            | Y47D3B.1       | Let, Lva, Egl, Unclassified, WT                       |
| 51 | Bm1_05160        | Troponin T.-related                                             | <i>tnt-2</i>   | Slu, Ste, Unc, Stp, Gro, WT                           |
| 50 | Bm1_55745        | sulfakinin receptor protein, putative                           | T23B3.4        | Emb, Unclassified, WT                                 |
| 50 | Bm1_39610        | hypothetical protein                                            | F40F11.2       | Sck, Emb, WT                                          |
| 49 | Bm1_11590        | Hypothetical 30.1 kDa protein                                   | ZC434.4        | Sle, Emb, Ste, Lva, Sck, Gro, Stp, WT                 |
| 49 | Bm1_22470        | ZC434.4 in chromosome I.-related conserved hypothetical protein | W02B8.6        | Emb, WT                                               |
| 49 | Bm1_52795        | hypothetical protein                                            | K09H11.3       | Cortical Dynamics abnormal, Emb, Ste                  |
| 49 | Bm1_23555        | UcrQ family protein                                             | F45H10.2       | Clr, WT, Stp, Gro                                     |
| 49 | Bm1_47145        | Cuticle collagen dpy-2 precursor, putative                      | <i>dpy-2</i>   | Dpy, Bmd, WT                                          |
| 49 | Bm1_45220        | CG7038-PA-related                                               | W04B5.4        | Lva, Emb, Larval Lethal-Early (L1/L2), Gro, WT        |
| 48 | Bm1_32990        | Apical junction molecule protein 1, isoform d-related           | <i>ajm-1</i>   | Emb, Unc, Gro, WT                                     |
| 48 | Bm1_08735        | hypothetical protein                                            | B0035.15       | Unc, Gro, WT                                          |
| 48 | Bm1_52640        | hypothetical protein                                            | Y57E12AL.6     | Sck, Emb, Lvl, Passage Through Meiosis defective, Ste |
| 48 | Bm1_16540        | hypothetical protein                                            | Y54G9A.7       | Emb, WT                                               |
| 48 | Bm1_20120        | PDZ domain containing protein                                   | C25G4.6        | Lva, Pvl, Ste, WT, Stp                                |
| 48 | Bm1_40975        | hypothetical protein                                            | Y23H5A.3       | Led, Slu, Emb, WT                                     |
| 47 | Bm1_41700        | Zn-finger in Ran binding protein and others containing protein  | <i>npp-7</i>   | Pronuclear/Nuclear Appearance abnormal, Pna, Emb      |
| 47 | Bm1_12550        | hypothetical protein                                            | <i>csn-1</i>   | Cyk, Sck, Emb, WT, Stp                                |
| 47 | Bm1_16780        | hypothetical protein                                            | C44C1.1        | Lvl, Sma, Unc, Gro, WT                                |
| 46 | Bm1_14325        | hypothetical protein                                            | M05B5.2        | Unclassified, Lon, Unc, Gro, WT                       |
| 46 | Bm1_00815        | Cuticle collagen 14, putative                                   | <i>col-14</i>  | Pvl, WT                                               |
| 46 | <b>Bm1_01990</b> | chitin synthase 2 ( <i>chs-2</i> ) fragment                     | <i>chs-2</i>   | Bmd, Emb, Unc, Ste, WT, Gro                           |
| 45 | Bm1_25060        | Nematode cuticle collagen N-terminal domain containing protein  | <i>col-180</i> | Bmd, Unc, Larval Lethal-Early (L1/L2), WT, Gro        |

|    |                  |                                                                                       |                |                                                                             |
|----|------------------|---------------------------------------------------------------------------------------|----------------|-----------------------------------------------------------------------------|
| 45 | Bm1_51260        | Innexin family protein Chain A, Structure Of A Brca2-Dss1 Complex., putative          | <i>inx-13</i>  | Unc, Rup, Stp, Gro, WT                                                      |
| 45 | Bm1_46165        |                                                                                       | Y119D3B.15     | Sck, Ste, WT                                                                |
| 44 | <b>Bm1_17930</b> | chitin synthase 2 ( <i>chs-2</i> ) fragment                                           | <i>chs-2</i>   | Bmd, Emb, Unc, Ste, WT, Gro                                                 |
| 44 | Bm1_32875        | Calponin homolog OV9M.-related                                                        | C53C9.2        | Gro, WT                                                                     |
| 43 | Bm1_25645        | hypothetical protein                                                                  | ZC247.1        | Sck, Ste, Sma, WT, Stp, Gro                                                 |
| 42 | Bm1_08745        | hypothetical protein                                                                  | C44B12.5       | Emb, Sterile F0/Fertility Problems, Ste, WT, Stp                            |
| 42 | Bm1_09360        | conserved hypothetical protein                                                        | <i>gei-16</i>  | Lva, Emb, Lvl, Gro, WT                                                      |
| 42 | Bm1_36270        | TspO/MBR family protein Dumpy : shorter than wild-type                                | C41G7.3        | Him, General Pace of Development abnormal, WT                               |
| 42 | Bm1_43045        | protein 10, isoform b, putative                                                       | <i>dpy-10</i>  | Dpy, Pch, Slu, WT                                                           |
| 42 | Bm1_34840        | collagen col-34 - <i>Caenorhabditis elegans</i> , putative                            | <i>col-108</i> | Dpy, Emb, Lvl, Unclassified, Unc, Bmd, Lva, WT, Larval Lethal-Early (L1/L2) |
| 42 | Bm1_23570        | conserved hypothetical protein                                                        | K10G9.2        | Prz, Pvl, Unc, Adl, Gro, WT                                                 |
| 42 | Bm1_36575        | conserved hypothetical protein                                                        | Y55H10A.1      | Osmotic Integrity defective, Sck, Sterile F0/Fertility Problems, Lvl, Ste   |
| 41 | Bm1_26170        | hypothetical protein                                                                  | Y47D3B.1       | Let, Lva, Egl, Unclassified, WT                                             |
| 41 | Bm1_28210        | hypothetical protein                                                                  | C44C1.1        | Lvl, Sma, Unc, Gro, WT                                                      |
| 41 | Bm1_37610        | Destabilase family protein                                                            | C55F2.2        | Ste, WT                                                                     |
| 41 | Bm1_23080        | ATP synthase f chain, mitochondrial.-related                                          | R53.4          | Bmd, Lva, General Pace of Development abnormal, Emb, Unclassified, Pvl, Ste |
| 41 | Bm1_42700        | hypothetical protein                                                                  | D1043.1        | Bmd, Lva, Clr, Emb, Unc, WT                                                 |
| 41 | Bm1_28670        | hypothetical protein                                                                  | ZK1236.5       | Clr, Gro, WT                                                                |
| 41 | Bm1_24580        | ATP synthase e chain, mitochondrial.-related                                          | R04F11.2       | Lva, Emb, Unclassified, WT, Gro                                             |
| 40 | Bm1_12855        | hypothetical protein                                                                  | <i>sas-5</i>   | Spindle Assembly abnormal, Emb                                              |
| 40 | Bm1_22670        | conserved hypothetical protein                                                        | F15B9.5        | Unclassified, WT                                                            |
| 39 | Bm1_50710        | hypothetical protein                                                                  | Y32G9B.1       | Ste, WT                                                                     |
| 39 | Bm1_18000        | Zinc finger, C2H2 type family protein                                                 | F10B5.3        | Unclassified, WT, Stp                                                       |
| 39 | Bm1_51520        | hypothetical protein                                                                  | Y59A8B.20      | Lon, WT                                                                     |
| 39 | Bm1_24165        | TolA protein.-related (similar to sut-1, involved in trans-splicing)                  | T13B5.8        | Emb, WT                                                                     |
| 38 | Bm1_27515        | hypothetical protein                                                                  | Y65B4BR.8      | Bmd, Emb, Unclassified, Pvl, Unc, WT                                        |
| 38 | Bm1_08545        | Mediator protein 4-related                                                            | <i>mdt-4</i>   | Egl, Pch, Emb, Rup, WT                                                      |
| 38 | Bm1_02565        | 40S ribosomal protein S12.-related                                                    | <i>rps-12</i>  | Dpy, Slu, Emb, Severe Pleiotropic Defects, Ste, Lva, Sck, WT                |
| 38 | Bm1_04880        | NADH-ubiquinone oxidoreductase AGGG subunit homolog, mitochondrialprecursor .-related | F44G4.2        | Lva, General Pace of Development abnormal, Emb, Unclassified                |
| 38 | Bm1_52140        | P40-related                                                                           | Y69E1A.2       | Emb, WT                                                                     |

|    |                  |                                                                       |               |                                                                    |
|----|------------------|-----------------------------------------------------------------------|---------------|--------------------------------------------------------------------|
| 38 | Bm1_00490        | CEH-25 homeobox protein-related                                       | <i>unc-62</i> | Ooc, Dpy, Egl, Mig, Emb, Unclassified, Pvl, Unc, WT                |
| 38 | Bm1_18060        | hypothetical protein                                                  | C16B8.4       | Emb, WT                                                            |
| 38 | Bm1_50825        | hypothetical protein                                                  | W06A7.2       | Unc, WT                                                            |
| 38 | Bm1_37860        | NADH-dependent xylose reductase.-related                              | F53F1.2       | Prz, Lvl, Unc, WT, Gro                                             |
| 37 | Bm1_23385        | conserved hypothetical protein                                        | C01B7.1       | Lva, Emb, WT, Gro                                                  |
| 37 | Bm1_37570        | predicted protein                                                     | <i>rig-1</i>  | Sck, Emb, WT, Stp                                                  |
| 37 | <b>Bm1_04665</b> | 2,3-bisphosphoglycerate-independent phosphoglycerate mutase, putative | F57B10.3      | Egl, Age, Emb, Lvl, Unc, Bmd, Gro, WT                              |
| 37 | Bm1_18340        | LIN-7, putative                                                       | <i>lin-7</i>  | Clr, WT, Gro                                                       |
| 37 | Bm1_54115        | RH01479p-related                                                      | Y95D11A.1     | Unclassified, Larval Arrest-Late (L3/L4), WT, Stp, Gro             |
| 37 | Bm1_54490        | hypothetical protein                                                  | F42G8.5       | Unclassified, WT                                                   |
| 37 | Bm1_00215        | conserved hypothetical protein                                        | Y75B8A.14     | Emb, WT                                                            |
| 37 | Bm1_27330        | conserved hypothetical protein                                        | B0432.3       | Clr, Emb, Lvl, Lva, Sck, Larval Arrest-Early (L1/L2), Stp, Gro, WT |
| 37 | Bm1_27330        | conserved hypothetical protein                                        | B0432.3       | Clr, Emb, Lvl, Lva, Sck, Larval Arrest-Early (L1/L2), Stp, Gro, WT |
| 37 | Bm1_15680        | hypothetical protein                                                  | M176.3        | Emb, Sterile F1, WT                                                |
| 37 | Bm1_27280        | hypothetical protein                                                  | <i>sys-1</i>  | Emb, Pvl, Unc, Rup, Bmd, Led, Lva, WT, Gro, Stp                    |
| 37 | Bm1_55000        | Troponin T, putative                                                  | <i>tnt-2</i>  | Slu, Ste, Unc, Stp, Gro, WT                                        |
| 37 | Bm1_43955        | hypothetical protein                                                  | <i>rod-1</i>  | Sck, Emb, WT                                                       |
| 36 | Bm1_08225        | conserved hypothetical protein                                        | T08A11.2      | Emb, Pvl, Unc, Ste, Adl, WT                                        |
| 36 | Bm1_13550        | conserved hypothetical protein                                        | M04F3.1       | Egl, Emb, Pvl, Rup, Unc, Sterile F1, WT, Stp                       |
| 36 | Bm1_43515        | Hypothetical 36.5 kDa protein C56G2.3 in chromosome III.-related      | C56G2.3       | Stp, Gro, WT                                                       |
| 36 | Bm1_25440        | hypothetical protein                                                  | T09B4.9       | Lva, General Pace of Development abnormal, Emb, Ste, Etv, Gro      |
| 36 | Bm1_19985        | cuticle collagen 2 precursor, putative                                | <i>col-97</i> | Dpy, Bmd, Unc, WT                                                  |
| 35 | Bm1_36335        | conserved hypothetical protein                                        | F49C12.11     | Dpy, Lva, Lvl, Unc, WT                                             |
| 35 | Bm1_40905        | Putative glutamate synthase, putative                                 | W07E11.1      | Lva, Emb, Gro, WT                                                  |
| 35 | Bm1_50900        | Conserved hypothetical protein, putative                              | T21G5.4       | Lva, Pvl, WT, Stp                                                  |
| 34 | Bm1_22525        | DNA-(Apurinic or apyrimidinic site) lyase-related                     | <i>apn-1</i>  | Emb, WT                                                            |

|    |           |                                                                             |                |                                                                                               |
|----|-----------|-----------------------------------------------------------------------------|----------------|-----------------------------------------------------------------------------------------------|
| 34 | Bm1_19065 | conserved hypothetical protein                                              | <i>pqn-22</i>  | Emb, WT                                                                                       |
| 34 | Bm1_29140 | hypothetical protein                                                        | W03F11.3       | Emb, WT                                                                                       |
| 34 | Bm1_17810 | vacuolar ATP synthase subunit H, putative                                   | <i>vha-17</i>  | Osmotic Integrity defective, Lva, Sck, Emb, Lvl, Ste                                          |
| 34 | Bm1_56515 | Nematode cuticle collagen N-terminal domain containing protein              | <i>col-84</i>  | Sister Chromatid Separation abnormal (Cross-eyed), Emb, Unclassified, WT                      |
| 34 | Bm1_09670 | NADH-ubiquinone oxidoreductase B22 subunit .-related                        | C16A3.5        | Lva, Emb, Unclassified, WT, Larval Lethal-Early (L1/L2), Gro                                  |
| 33 | Bm1_46400 | Nematode cuticle collagen N-terminal domain containing protein              | <i>rol-6</i>   | Dpy, Egl, WT                                                                                  |
| 33 | Bm1_55790 | hypothetical protein                                                        | D2030.3        | Lva, Larval Arrest-Early (L1/L2), Unclassified, WT, Gro                                       |
| 33 | Bm1_13030 | conserved hypothetical protein                                              | <i>icl-1</i>   | Lva, Emb, Ste, Unc, WT, Gro                                                                   |
| 32 | Bm1_10505 | cuticle collagen 34, putative                                               | <i>col-125</i> | Dpy, Larval Lethal-Late (L3/L4), Lvl, Unclassified, Unc, Bmd, WT, Larval Lethal-Early (L1/L2) |
| 32 | Bm1_48195 | Innexin family protein                                                      | <i>inx-3</i>   | Lva, Unc, Gro, WT                                                                             |
| 32 | Bm1_31780 | Clc-4 protein., putative                                                    | K10D6.2        | Emb, WT                                                                                       |
| 32 | Bm1_49770 | Mitochondrial ribosomal protein L51 / S25 / CI-B8 domain containing protein | C25A1.13       | Emb, WT                                                                                       |
| 32 | Bm1_00720 | conserved hypothetical protein                                              | C44B9.2        | Gro, WT                                                                                       |
| 31 | Bm1_12400 | hypothetical protein                                                        | F10E7.6        | Clr, Sck, Larval Arrest-Early (L1/L2), WT, Gro                                                |
| 31 | Bm1_23180 | ribosomal protein L32 containing protein                                    | C30C11.1       | Lva, Emb, Unclassified, Larval Lethal-Early (L1/L2), WT, Gro                                  |
| 31 | Bm1_09610 | Troponin T, putative                                                        | <i>tnt-2</i>   | Slu, Ste, Unc, Stp, Gro, WT                                                                   |
| 31 | Bm1_16685 | hypothetical protein                                                        | <i>hcp-4</i>   | Sister Chromatid Separation abnormal (Cross-eyed), Emb, Ste, Mul                              |
| 31 | Bm1_52255 | TB2/DP1, HVA22 family protein                                               | C36H8.1        | Slu, WT                                                                                       |
| 31 | Bm1_07780 | immunogenic protein 3, putative                                             | ZK856.7        | Developmental Delay, WT                                                                       |
| 31 | Bm1_45405 | LD03534p-related                                                            | T12G3.5        | Lva, Unclassified, WT, Gro                                                                    |
| 30 | Bm1_41030 | conserved hypothetical protein                                              | <i>pqn-38</i>  | Dpy, Pch, Pace of P-Lineage abnormal, Emb, Unc, Rup, Gro, WT                                  |
| 30 | Bm1_52065 | hypothetical protein                                                        | <i>pbs-5</i>   | Lva, Ocs, Emb, Passage Through Meiosis defective, Unc, Ste                                    |
| 30 | Bm1_23010 | hypothetical protein                                                        | CD4.3          | Lva, Emb, Unclassified, WT, Gro                                                               |
| 30 | Bm1_57645 | conserved hypothetical protein                                              | <i>patr-1</i>  | Emb, Unclassified, Lvl, WT                                                                    |
| 30 | Bm1_07925 | peroxisomal membrane anchor protein, putative                               | <i>prx-14</i>  | Lva, Larval Arrest-Early (L1/L2), WT, Gro                                                     |
| 29 | Bm1_09975 | hypothetical protein                                                        | C44B7.3        | Egl, WT                                                                                       |
| 29 | Bm1_52560 | hypothetical protein                                                        | T10G3.1        | Emb, WT                                                                                       |



|    |           |                                                                                                         |                |                                                                                                                        |
|----|-----------|---------------------------------------------------------------------------------------------------------|----------------|------------------------------------------------------------------------------------------------------------------------|
| 29 | Bm1_55970 | hypothetical protein                                                                                    | C23G10.8       | Emb, Pvl, Ste, WT, Gro<br>Emb, Nuclear Appearance<br>abnormal, Pvl, Ste, Unc, Stp                                      |
| 29 | Bm1_27240 | hypothetical protein                                                                                    | T09A5.9        |                                                                                                                        |
| 29 | Bm1_14115 | hypothetical protein                                                                                    | <i>ain-1</i>   | Egl, Unc, WT<br>Lva, Unclassified, Larval Arrest-<br>Late (L3/L4), Stp, Gro                                            |
| 29 | Bm1_04775 | hypothetical protein                                                                                    | H35B03.2       |                                                                                                                        |
| 29 | Bm1_47280 | WD-repeat protein WDC146.-related                                                                       | F25B5.7        | Let, Unclassified, Rup, WT<br>Prz, Lva, Sck, Ste, Adl, WT,<br>Larval Lethal-Early (L1/L2)                              |
| 28 | Bm1_05925 | EGF-like domain containing protein<br>Zn-finger in Ran binding protein and<br>others containing protein | <i>mup-4</i>   |                                                                                                                        |
| 28 | Bm1_49935 |                                                                                                         | C27H5.3        | Emb, WT<br>Lva, Emb, Lvl, Larval Arrest-Late<br>(L3/L4), Lpd, WT, Gro                                                  |
| 28 | Bm1_21655 | hypothetical protein                                                                                    | <i>lpd-9</i>   |                                                                                                                        |
| 28 | Bm1_19420 | hypothetical protein                                                                                    | C16C10.6       | Lva, Emb, WT, Gro                                                                                                      |
| 28 | Bm1_07450 | hypothetical protein                                                                                    | C07D8.3        | Lva, Emb, Unc, WT                                                                                                      |
| 27 | Bm1_54105 | hypothetical protein<br>RNA dependent RNA polymerase<br>family protein                                  | <i>tag-319</i> | Emb, Ste, WT, Stp                                                                                                      |
| 27 | Bm1_12525 | Nematode astacin protease protein<br>9, isoform c-related                                               | <i>ego-1</i>   | Cyk, Emb, WT, Gro                                                                                                      |
| 27 | Bm1_13915 | predicted protein                                                                                       | <i>nas-9</i>   | Emb, WT                                                                                                                |
| 27 | Bm1_39000 | Nematode cuticle collagen N-<br>terminal domain containing protein                                      | K04C2.5        | Sck, Lvl, WT, Stp, Gro                                                                                                 |
| 26 | Bm1_54705 | hypothetical protein                                                                                    | <i>col-17</i>  | Dpy, Sck, WT                                                                                                           |
| 26 | Bm1_05210 |                                                                                                         | <i>dpy-7</i>   | Dpy, Egl, Unc, WT, Gro                                                                                                 |
| 26 | Bm1_56880 | hypothetical protein<br>RNA-directed RNA polymerase 1-<br>related                                       | Y38E10A.24     | Clr, Sck, Emb, Gro                                                                                                     |
| 26 | Bm1_17365 |                                                                                                         | <i>ego-1</i>   | Cyk, Emb, WT, Gro                                                                                                      |
| 26 | Bm1_40345 | conserved hypothetical protein<br>Ground-like domain containing<br>protein                              | F59B10.3       | Emb, WT                                                                                                                |
| 26 | Bm1_52595 | predicted protein                                                                                       | <i>grl-4</i>   | Gro, WT                                                                                                                |
| 26 | Bm1_38270 | Transmembrane amino acid<br>transporter protein                                                         | <i>tag-273</i> | Unclassified, Stp, WT                                                                                                  |
| 26 | Bm1_06665 | conserved hypothetical protein                                                                          | F21D12.3       | Emb, WT                                                                                                                |
| 25 | Bm1_39335 | BED zinc finger family protein                                                                          | B0310.1        | Unclassified, WT                                                                                                       |
| 25 | Bm1_41530 |                                                                                                         | <i>gei-13</i>  | Rol, Dpy, Unc, WT<br>Pch, Emb, Severe Pleiotropic<br>Defects, Ste, Bmd, Lva, Sterile<br>F0/Fertility Problems, Gro, WT |
| 25 | Bm1_00640 | hypothetical protein<br>Cuticle collagen dpy-7 precursor,<br>putative                                   | <i>ifg-1</i>   |                                                                                                                        |
| 25 | Bm1_06810 |                                                                                                         | <i>dpy-7</i>   | Dpy, Egl, Unc, WT, Gro                                                                                                 |
| 25 | Bm1_18685 | conserved hypothetical protein<br>NADH-ubiquinone oxidoreductase<br>15 kDa subunit.-related             | W01A8.4        | Bmd, Lva, Emb, WT                                                                                                      |
| 25 | Bm1_49180 | Hypothetical protein                                                                                    | Y54E10BL.5     | Unclassified                                                                                                           |
| 25 | Bm1_19740 |                                                                                                         | K10D6.2        | Emb, WT                                                                                                                |
| 25 | Bm1_45285 | CG13018-PA, putative                                                                                    | Y18D10A.16     | Gro, WT                                                                                                                |

|    |           |                                                                                     |               |                                                                              |
|----|-----------|-------------------------------------------------------------------------------------|---------------|------------------------------------------------------------------------------|
| 25 | Bm1_53210 | predicted protein                                                                   | T19A5.3       | Lvl, WT                                                                      |
| 25 | Bm1_37315 | hypothetical protein                                                                | <i>hmg-5</i>  | WT, Stp                                                                      |
| 25 | Bm1_07795 | hypothetical protein                                                                | F45E12.5      | Emb, WT, Stp                                                                 |
| 24 | Bm1_11840 | hypothetical protein                                                                | K07B1.6       | Lva, WT                                                                      |
| 24 | Bm1_21815 | hypothetical protein                                                                | F10E9.4       | Lva, Unclassified, Lvl, Gro, WT                                              |
| 24 | Bm1_32260 | conserved hypothetical protein<br>Salivary glue protein Sgs-3<br>precursor.-related | C15C7.5       | Clr, Unclassified, Unc, WT, Gro                                              |
| 24 | Bm1_04070 | hypothetical protein                                                                | H11E01.3      | Emb, WT<br>Lva, Spd, Spindle Assembly<br>abnormal, Emb, Unclassified,<br>Ste |
| 24 | Bm1_50790 | hypothetical protein                                                                | <i>spd-2</i>  | Emb, WT, Stp                                                                 |
| 24 | Bm1_22765 | hypothetical protein                                                                | ZK484.4       | Emb, WT                                                                      |
| 24 | Bm1_22905 | hypothetical protein                                                                | ZK858.5       | Emb, WT                                                                      |
| 24 | Bm1_38370 | predicted protein                                                                   | <i>flp-1</i>  | Aldicarb resistant, WT                                                       |
| 23 | Bm1_15075 | PDZ domain containing protein                                                       | T21G5.4       | Lva, Pvl, WT, Stp                                                            |
| 23 | Bm1_14650 | hypothetical protein                                                                | F23H11.2      | Ste, Sma, WT, Stp                                                            |
| 23 | Bm1_55755 | major sperm protein, putative                                                       | <i>ssp-16</i> | Unclassified, WT                                                             |
| 23 | Bm1_55755 | major sperm protein, putative                                                       | <i>ssp-19</i> | Unclassified, WT                                                             |
| 23 | Bm1_53230 | hypothetical protein                                                                | C26F1.3       | Gro, WT<br>Prz, Clr, Lvl, Unc, Lva, Larval<br>Arrest-Early (L1/L2), Gro, WT  |
| 23 | Bm1_53630 | hypothetical protein                                                                | F09E5.11      | Emb, WT                                                                      |
| 23 | Bm1_09930 | kinesin light chain, putative                                                       | <i>klc-2</i>  | Emb, WT                                                                      |
| 22 | Bm1_23380 | Zinc finger, C2H2 type family protein                                               | C01B7.1       | Lva, Emb, WT, Gro<br>Lva, Clr, Emb, Unclassified,<br>Sma, WT, Gro            |
| 22 | Bm1_15990 | RE06140p-related                                                                    | T21B10.1      | Emb, WT                                                                      |
| 22 | Bm1_09120 | Hypothetical protein                                                                | E01A2.6       | Gro, WT                                                                      |
| 22 | Bm1_46225 | hypothetical protein<br>SWIB/MDM2 domain containing<br>protein                      | C05B5.4       | Emb, WT                                                                      |
| 22 | Bm1_21885 | hypothetical protein                                                                | T24G10.2      | Emb, Pvl, Passage Through<br>Meiosis defective, Stp, WT                      |
| 22 | Bm1_46355 | hypothetical protein                                                                | <i>emb-30</i> | Egl, Pvl, Unc, WT                                                            |
| 22 | Bm1_28165 | hypothetical protein<br>Probable mitochondrial import<br>receptor subunit TOM7-like | C26B9.3       | Unclassified, WT<br>Osmotic Integrity defective,<br>Emb, WT                  |
| 22 | Bm1_01765 | Hypothetical protein                                                                | R186.3        | Emb, WT                                                                      |
| 22 | Bm1_01505 | Conserved hypothetical protein,<br>putative                                         | F11G11.5      | Emb, WT<br>Clr, Pch, Emb, Unclassified, Lva,<br>Gro, Stp, WT                 |
| 22 | Bm1_44095 | hypothetical protein                                                                | C06A8.2       | Lva, Emb, WT, Larval Lethal-<br>Early (L1/L2), Gro                           |
| 21 | Bm1_19440 | hypothetical protein                                                                | K12H4.5       | Lva, Emb, Unclassified, WT                                                   |
| 21 | Bm1_34110 | Resistance to inhibitors of<br>cholinesterase protein 3-related                     | <i>ric-3</i>  | Lva, Emb, Unclassified, WT                                                   |
| 21 | Bm1_36295 | cholinesterase protein 3-related                                                    | <i>ric-3</i>  | Lva, Emb, Unclassified, WT                                                   |

|    |           |                                                                |                |                                                                |
|----|-----------|----------------------------------------------------------------|----------------|----------------------------------------------------------------|
| 21 | Bm1_06340 | hypothetical protein                                           | K02E10.4       | Unclassified, WT                                               |
| 21 | Bm1_50365 | conserved hypothetical protein                                 | F09G2.9        | Emb, Ste, WT                                                   |
| 21 | Bm1_41110 | conserved hypothetical protein                                 | C45G9.11       | Sterile F0/Fertility Problems, WT                              |
| 21 | Bm1_53505 | myotactin form B, putative                                     | <i>let-805</i> | Prz, Sck, Emb, Lvl, Adl, Ste, WT                               |
| 20 | Bm1_35045 | hypothetical protein                                           | H05L03.3       | Unclassified, WT                                               |
| 20 | Bm1_38610 | conserved hypothetical protein                                 | <i>tnt-4</i>   | Larval Arrest-Early (L1/L2), WT                                |
| 20 | Bm1_13170 | conserved hypothetical protein                                 | K04C2.2        | Pch, Sck, Pvl, Lvl, Ste, WT, Stp, Gro                          |
| 20 | Bm1_32180 | hypothetical protein                                           | F55A12.2       | Gro, WT                                                        |
| 20 | Bm1_07440 | hypothetical protein                                           | Y53F4B.13      | Ste, WT                                                        |
| 20 | Bm1_26400 | Fibronectin type III domain containing protein                 | <i>ptp-3</i>   | Emb, Morphology defect, WT                                     |
| 20 | Bm1_25025 | Spc97 / Spc98 family protein                                   | <i>gip-1</i>   | Spindle Assembly abnormal, Emb, WT                             |
| 20 | Bm1_43720 | conserved hypothetical protein                                 | <i>eif-3.F</i> | Dpy, Emb, Unclassified, Pvl, Bmd, Lva, WT, Stp, Gro            |
| 20 | Bm1_10260 | gene model 83, putative                                        | ZK430.7        | Lva, Emb, Pvl, Larval Arrest-Late (L3/L4), Ste, WT, Gro        |
| 20 | Bm1_37335 | ankyrin-related unc-44-related                                 | <i>unc-44</i>  | Dpy, Slu, Unc, Sma, Gro, WT                                    |
| 19 | Bm1_20495 | hypothetical protein                                           | Y40B1B.5       | Gro, WT                                                        |
| 19 | Bm1_33635 | hypothetical protein                                           | R09F10.3       | Emb, Ste, WT                                                   |
| 19 | Bm1_54575 | Membrane calcium atpase protein 3, isoform a, putative         | <i>mca-3</i>   | Prz, Adl, WT                                                   |
| 19 | Bm1_03645 | Warthog protein-related                                        | <i>wrt-4</i>   | Emb, WT                                                        |
| 18 | Bm1_10215 | Calcium-binding protein.-related                               | C01G8.9        | Let, Emb, Lvl, Ste, Rup, Bmd, Led, WT, Gro                     |
| 18 | Bm1_00120 | ATP synthase epsilon chain, mitochondrial, putative            | F32D1.2        | Emb, Severe Pleiotropic Defects, WT, Stp, Gro                  |
| 18 | Bm1_21210 | Innexin inx-14.-related                                        | <i>inx-3</i>   | Lva, Unc, Gro, WT                                              |
| 18 | Bm1_01060 | Calcium-binding protein.-related                               | K01A6.4        | Emb, Unc, Gro, WT                                              |
| 18 | Bm1_45055 | Chitin binding Peritrophin-A domain containing protein         | W03F11.1       | Ste, WT                                                        |
| 17 | Bm1_10475 | hypothetical protein                                           | W01A8.5        | Emb, Unclassified, Stp, WT                                     |
| 17 | Bm1_46520 | predicted protein                                              | C54G4.9        | Emb, WT                                                        |
| 17 | Bm1_14055 | ShTK domain containing protein                                 | F48G7.5        | Sck, Ste, WT, Stp                                              |
| 17 | Bm1_22500 | hypothetical protein                                           | F20D12.2       | Bmd, Sck, Emb, Unclassified, Lvl, Ste, WT                      |
| 17 | Bm1_46015 | F-box domain containing protein                                | K03H1.11       | Emb, WT                                                        |
| 17 | Bm1_06310 | protein R52.2-related                                          | C07D8.2        | Lva, Emb, Unc, WT                                              |
| 16 | Bm1_18740 | Transmembrane cell adhesion receptor mua-3 precursor, putative | <i>mua-3</i>   | Prz, Lvl, Ste, Unc, Lva, Sck, WT, Larval Lethal-Early (L1/L2)  |
| 16 | Bm1_47930 | VAB-10A protein-related                                        | <i>vab-10</i>  | Prz, Let, Emb, Pvl, Lvl, Ste, Rup, Unc, Bmd, Lva, Gro, Stp, WT |

|    |           |                                                                                                                                         |               |                                                                                                  |
|----|-----------|-----------------------------------------------------------------------------------------------------------------------------------------|---------------|--------------------------------------------------------------------------------------------------|
| 16 | Bm1_05890 | B20-1 protein, putative<br>FLYWCH zinc finger domain<br>containing protein                                                              | <i>gei-16</i> | Lva, Emb, Lvl, Gro, WT                                                                           |
| 16 | Bm1_03770 | Tudor domain containing protein                                                                                                         | <i>peb-1</i>  | Clr, Pvl, Unclassified, Unc, WT                                                                  |
| 16 | Bm1_25120 | hypothetical protein                                                                                                                    | <i>tudr-1</i> | Emb, WT                                                                                          |
| 16 | Bm1_38875 | major sperm protein 2 , putative<br>cytoskeletal MSP                                                                                    | Y62E10A.11    | Emb, Pvl, Unc, Ste, Stp, Gro,<br>WT                                                              |
| 15 | Bm1_13600 | hypothetical protein, conserved<br>Major Sperm Protein (MSP), putative<br>cytoskeletal MSP                                              | <i>msp-40</i> | Emb, Unclassified, WT<br>Aberrant Cytoplasmic<br>Structures, Lva, Clr, Emb, Mlt,<br>Unc, WT, Gro |
| 15 | Bm1_23015 | hypothetical protein                                                                                                                    | CD4.4         | Sck, Emb, Unclassified, Ste, WT<br>Pch, Unclassified, Lvl, Lva, Sck,<br>Stp, Gro, WT             |
| 15 | Bm1_13605 | hypothetical protein                                                                                                                    | <i>msp-50</i> | Egl, Pvl, Unc, Sma, WT                                                                           |
| 15 | Bm1_33105 | hypothetical protein                                                                                                                    | Y57A10A.27    | Gro, WT                                                                                          |
| 15 | Bm1_22560 | hypothetical protein                                                                                                                    | <i>dpy-22</i> |                                                                                                  |
| 15 | Bm1_10860 | hypothetical protein                                                                                                                    | Y106G6A.2     |                                                                                                  |
| 15 | Bm1_22820 | hypothetical protein                                                                                                                    | R10H10.4      | Aldicarb resistant, Emb, WT                                                                      |
| 15 | Bm1_46970 | hypothetical protein                                                                                                                    | C14A4.12      | Unclassified, WT<br>Bmd, General Pace of<br>Development abnormal, Emb,<br>Etv, WT, Stp, Gro      |
| 14 | Bm1_38880 | Mitochondrial ATP synthase g<br>subunit family protein                                                                                  | <i>asg-1</i>  | Lva, Unc, Gro, WT                                                                                |
| 14 | Bm1_46130 | hypothetical protein                                                                                                                    | Y37D8A.16     |                                                                                                  |
| 14 | Bm1_42730 | conserved hypothetical protein                                                                                                          | Y54E10A.7     | Lva, Emb, WT, Gro                                                                                |
| 14 | Bm1_09160 | conserved hypothetical protein                                                                                                          | F18C12.3      | Gro, WT<br>Egl, Pvl, Lon, Unc, Rup, Bmd,<br>Stp, WT, Gro                                         |
| 14 | Bm1_29320 | hypothetical protein                                                                                                                    | <i>spd-1</i>  | Egl, Pvl, Unc, WT                                                                                |
| 14 | Bm1_57650 | conserved hypothetical protein                                                                                                          | ZK930.3       | Cortical Dynamics abnormal,<br>Emb, Ste                                                          |
| 14 | Bm1_56480 | RhoGAP domain containing protein                                                                                                        | K09H11.3      | Emb, WT                                                                                          |
| 13 | Bm1_26235 | hypothetical protein                                                                                                                    | W02B8.4       |                                                                                                  |
| 13 | Bm1_55690 | NADH-ubiquinone oxidoreductase<br>B12 subunit .-related<br>Hypothetical 20.9 kDa protein in<br>PLB1-HXT2 intergenic region.-<br>related | C18E9.4       | Lva, Emb, WT, Gro                                                                                |
| 13 | Bm1_10660 | hypothetical protein                                                                                                                    | T01D1.4       | Emb, WT<br>Dpy, Lva, Larval Arrest-Early<br>(L1/L2), Lvl, Unc, WT, Gro                           |
| 13 | Bm1_41635 | hypothetical protein                                                                                                                    | R07E5.7       |                                                                                                  |
| 13 | Bm1_51715 | hypothetical protein                                                                                                                    | C14C10.4      | Lva, Emb, Ste, WT, Gro                                                                           |
| 13 | Bm1_40800 | Helix-loop-helix DNA-binding domain<br>containing protein                                                                               | <i>hlh-13</i> | Lva, Emb, Lvl, Unc, WT                                                                           |
| 13 | Bm1_50395 | hypothetical protein                                                                                                                    | <i>sgo-1</i>  | Lva, Emb, Unclassified, WT                                                                       |
| 12 | Bm1_53760 | cytochrome-c oxidase, putative                                                                                                          | Y71H2AM.5     | Lva, Clr, Emb, WT, Stp, Gro                                                                      |
| 12 | Bm1_28945 | hypothetical protein                                                                                                                    | F33D11.5      | Ste, WT                                                                                          |
| 12 | Bm1_50000 | Conserved hypothetical protein,<br>putative                                                                                             | F02E9.5       | Emb, WT                                                                                          |

|    |           |                                                      |                |                                                                                                   |
|----|-----------|------------------------------------------------------|----------------|---------------------------------------------------------------------------------------------------|
| 12 | Bm1_53515 | conserved hypothetical protein                       | <i>let-805</i> | Prz, Sck, Emb, Lvl, Adl, Ste, WT                                                                  |
| 12 | Bm1_33500 | hypothetical protein                                 | Y54E10A.16     | Prz, Egl, WT<br>Emb, Unclassified, Lvl, Unc, Lva,<br>Sck, WT, Stp, Gro                            |
| 12 | Bm1_36265 | conserved hypothetical protein                       | <i>smn-1</i>   |                                                                                                   |
| 12 | Bm1_29880 | Ubiquitin carboxyl-terminal hydrolase family protein | Y67D2.2        | Emb, Lvl, WT<br>Lva, Sck, Emb, Sma, WT, Stp,<br>Gro                                               |
| 12 | Bm1_52720 | Conserved hypothetical protein, putative             | <i>lpl-1</i>   |                                                                                                   |
| 12 | Bm1_21695 | hypothetical protein                                 | E01G4.2        | Lva, Larval Lethal-Late (L3/L4),<br>Ste, WT                                                       |
| 12 | Bm1_23935 | heavy metal-associated domain containing protein     | <i>cuc-1</i>   | Unclassified, WT                                                                                  |
| 12 | Bm1_06925 | F26F3.2 protein -related                             | <i>ndg-4</i>   | Bmd, Emb, WT<br>General Pace of Development abnormal, Larval Arrest-Early (L1/L2), WT             |
| 12 | Bm1_07615 | Peroxin-3 family protein                             | C15H9.10       | Pronuclear/Nuclear Appearance abnormal, WT                                                        |
| 12 | Bm1_46775 | hypothetical protein                                 | T24F1.2        |                                                                                                   |
| 11 | Bm1_29000 | hypothetical protein                                 | <i>tag-286</i> | Emb, WT                                                                                           |
| 11 | Bm1_27615 | bZIP transcription factor family protein             | <i>fos-1</i>   | Pvl, Ste, Rup, WT, Stp                                                                            |
| 11 | Bm1_32720 | hypothetical protein                                 | C29H12.6       | Unclassified, WT<br>Emb, Unclassified, Pvl, Unc,<br>Rup, Bmd, Lva, Sck, WT, Gro,<br>Stp           |
| 11 | Bm1_07485 | hypothetical protein                                 | K04G7.11       | Unclassified, WT                                                                                  |
| 11 | Bm1_26745 | hypothetical protein                                 | C23H3.2        |                                                                                                   |
| 11 | Bm1_18115 | hypothetical protein                                 | <i>npp-15</i>  | Emb, WT                                                                                           |
| 11 | Bm1_00910 | Zinc finger, C2H2 type family protein                | F10B5.3        | Unclassified, WT, Stp                                                                             |
| 11 | Bm1_43075 | hypothetical protein                                 | C50F2.2        | Emb, WT                                                                                           |
| 11 | Bm1_02140 | Lethal protein 805, isoform d, putative              | <i>let-805</i> | Prz, Sck, Emb, Lvl, Adl, Ste, WT                                                                  |
| 10 | Bm1_53390 | Ubiquinone biosynthesis protein                      | <i>coq-4</i>   | Age, Unclassified, WT                                                                             |
| 10 | Bm1_52605 | COQ4 homolog, putative                               | C50E3.5        | Emb, WT, Stp<br>Pronuclear/Nuclear Appearance abnormal, WT                                        |
| 10 | Bm1_05820 | hypothetical protein                                 | B0240.4        | Ste, WT                                                                                           |
| 10 | Bm1_54895 | hypothetical protein                                 | C08C3.4        | Lva, Emb, Lvl, Unc, Ste, Gro,<br>WT                                                               |
| 10 | Bm1_37705 | NHR1 homology to TAF family protein                  | <i>taf-4</i>   |                                                                                                   |
| 10 | Bm1_16040 | hypothetical protein                                 | F01F1.3        | Emb, WT                                                                                           |
| 9  | Bm1_02065 | Abnormal cell migration protein 10, putative         | <i>mig-10</i>  | Egl, Emb, Unc, Gro, WT<br>Egg Size abnormal, Emb,<br>Unclassified, Lvl, Unc, Ste, Lva,<br>Sck, WT |
| 9  | Bm1_41775 | UBA/TS-N domain containing protein                   | <i>pqn-59</i>  |                                                                                                   |

|   |           |                                                                         |                |                                                                                       |
|---|-----------|-------------------------------------------------------------------------|----------------|---------------------------------------------------------------------------------------|
| 9 | Bm1_19380 | hypothetical protein<br>28S ribosomal protein S30,                      | F42G4.6        | Aldicarb resistant, WT                                                                |
| 9 | Bm1_56530 | mitochondrial, putative                                                 | B0511.8        | Lva, Emb, Pvl, Ste, Sma, WT                                                           |
| 9 | Bm1_30695 | hypothetical protein                                                    | R04F11.5       | Emb, WT                                                                               |
| 9 | Bm1_32280 | hypothetical protein                                                    | <i>tag-343</i> | Unc, Gro, WT                                                                          |
| 9 | Bm1_24615 | ATP synthase B chain, mitochondrial<br>precursor, putative              | <i>asb-2</i>   | Lva, General Pace of<br>Development abnormal, Emb,<br>Unclassified, Ste, Stp, Gro, WT |
| 8 | Bm1_09195 | Thyroglobulin type-1 repeat family<br>protein                           | <i>mlt-11</i>  | Lva, Emb, Unc, WT                                                                     |
| 8 | Bm1_42645 | hypothetical protein                                                    | <i>mut-7</i>   | Lva, WT                                                                               |
| 8 | Bm1_01030 | hypothetical protein                                                    | T08H4.2        | Emb, WT                                                                               |
| 8 | Bm1_50115 | Hypothetical UPF0172 protein<br>CG3501.-related                         | F25H2.4        | Clr, Emb, Unclassified, Unc, Etv,<br>Complex Phenotype, Lva, Gro,<br>Stp, WT          |
| 7 | Bm1_26495 | hypothetical protein                                                    | T07C12.12      | Emb, WT                                                                               |
| 7 | Bm1_46050 | Zinc finger, C2H2 type family protein                                   | ZC395.8        | Sck, Unc, WT, Stp                                                                     |
| 7 | Bm1_01100 | hypothetical protein                                                    | T06A10.2       | Clr, Emb, Larval Arrest-Early<br>(L1/L2), Lon, Gro, WT                                |
| 7 | Bm1_27360 | hypothetical protein                                                    | T14B4.1        | Emb, WT                                                                               |
| 7 | Bm1_35060 | Troponin family protein                                                 | <i>tni-3</i>   | Let, Unclassified, WT                                                                 |
| 7 | Bm1_10425 | hypothetical protein                                                    | C06A5.3        | Pvl, Stp, WT                                                                          |
| 6 | Bm1_44890 | hypothetical protein                                                    | W02D3.10       | Emb, WT                                                                               |
| 6 | Bm1_42145 | OTU-like cysteine protease family<br>protein                            | <i>duo-1</i>   | Aldicarb resistant, WT                                                                |
| 6 | Bm1_06460 | hypothetical protein                                                    | ZC513.1        | Unclassified, WT                                                                      |
| 6 | Bm1_56405 | hypothetical protein                                                    | C31C9.2        | Emb, Gro, WT                                                                          |
| 6 | Bm1_23670 | FRG1 protein homolog, putative                                          | ZK1010.3       | Lva, Gro, WT                                                                          |
| 6 | Bm1_34425 | Ctr copper transporter family protein                                   | F27C1.2        | Dpy, Ste, Sma, WT, Stp, Gro                                                           |
| 6 | Bm1_08610 | Hypothetical protein                                                    | <i>unc-10</i>  | Aldicarb resistant, WT                                                                |
| 6 | Bm1_05190 | hypothetical protein                                                    | T09B4.2        | Emb, WT                                                                               |
| 6 | Bm1_13195 | hypothetical protein                                                    | B0495.2        | Emb, WT                                                                               |
| 6 | Bm1_18845 | GRIM-19 protein                                                         | C34B2.8        | Lva, Sle, Emb, WT, Gro                                                                |
| 5 | Bm1_19290 | hypothetical protein                                                    | <i>npp-16</i>  | Larval Arrest-Early (L1/L2), WT                                                       |
| 5 | Bm1_01955 | LPXTG cell wall surface anchor<br>family protein, putative              | <i>tbx-33</i>  | Bmd, Lva, Emb, Sterile<br>F0/Fertility Problems, Unc, WT                              |
| 5 | Bm1_17130 | Kunitz/Bovine pancreatic trypsin<br>inhibitor domain containing protein | <i>mlt-11</i>  | Lva, Emb, Unc, WT                                                                     |
| 4 | Bm1_09640 | Nematode cuticle collagen N-<br>terminal domain containing protein      | <i>dpy-9</i>   | Dpy, Unc, WT                                                                          |
| 4 | Bm1_57420 | Zinc finger, C2H2 type family protein                                   | ZK867.1        | Let, Egl, Unc, WT                                                                     |
| 4 | Bm1_09565 | Transmembrane amino acid<br>transporter protein                         | Y32F6A.4       | Unclassified, WT                                                                      |

|   |           |                                                                          |                |                                                                                                                                                         |
|---|-----------|--------------------------------------------------------------------------|----------------|---------------------------------------------------------------------------------------------------------------------------------------------------------|
| 4 | Bm1_03010 | PRO0477p-related                                                         | Y50D7A.9       | Unclassified, WT                                                                                                                                        |
| 4 | Bm1_10315 | Long protein 1, isoform b, putative                                      | <i>lon-1</i>   | Sck, Emb, WT                                                                                                                                            |
| 4 | Bm1_35660 | Succinate dehydrogenase, putative<br>Hypothetical thiol protease C06G4.2 | F33A8.5        | Lva, Clr, Emb, WT, Gro                                                                                                                                  |
| 4 | Bm1_21040 | in chromosome III.-related                                               | <i>clp-1</i>   | Ced, WT                                                                                                                                                 |
| 4 | Bm1_06045 | conserved hypothetical protein                                           | K06C4.15       | Lva, Emb, Unc, WT                                                                                                                                       |
| 3 | Bm1_49240 | hypothetical protein                                                     | <i>irs-2</i>   | Unclassified, Gro, WT                                                                                                                                   |
| 3 | Bm1_28060 | Hypothetical protein                                                     | R12E2.12       | Lva, Unclassified, WT                                                                                                                                   |
| 3 | Bm1_13520 | Hypothetical protein-conserved                                           | C05D11.10      | Let, Lva, Emb, Gro, WT                                                                                                                                  |
| 3 | Bm1_20745 | adenosine deaminase ADR-1C,<br>putative                                  | <i>adr-1</i>   | Lva, Unclassified, WT                                                                                                                                   |
| 2 | Bm1_39165 | cAMP-dependent protein kinase<br>regulatory chain, putative              | <i>kin-2</i>   | Dpy, Lvl, Unc, Bmd, Lva, Stp,<br>Larval Lethal-Early (L1/L2), WT                                                                                        |
| 2 | Bm1_16530 | Hint module family protein                                               | <i>qua-1</i>   | Lva, Clr, Larval Lethal-Late<br>(L3/L4), Mlt, Unc, WT<br>Bli, Sister Chromatid Separation<br>abnormal (Cross-eyed), Emb,<br>Unclassified, Pvl, Unc, Gro |
| 2 | Bm1_43570 | hypothetical protein                                                     | F55C5.4        |                                                                                                                                                         |
| 2 | Bm1_24565 | conserved hypothetical protein                                           | <i>mps-1</i>   | Emb, WT                                                                                                                                                 |
| 2 | Bm1_15165 | hypothetical protein                                                     | C56G2.1        | Emb, Sterile F1, WT                                                                                                                                     |
| 2 | Bm1_29960 | von Willebrand factor type A domain<br>containing protein                | M01E10.2       | Dpy, Unclassified, WT                                                                                                                                   |
| 1 | Bm1_52385 | hypothetical protein                                                     | Y24D9A.1       | Sterile F1, WT                                                                                                                                          |
| 1 | Bm1_42980 | Immunoglobulin I-set domain<br>containing protein                        | <i>oig-2</i>   | Unclassified, WT                                                                                                                                        |
| 1 | Bm1_08025 | F-box domain containing protein                                          | F54D5.9        | Emb, WT                                                                                                                                                 |
| 1 | Bm1_03155 | gag protein-related                                                      | F07B7.6        | Lva, Emb, Unc, WT                                                                                                                                       |
| 1 | Bm1_06290 | hypothetical protein                                                     | K06C4.14       | Emb, WT                                                                                                                                                 |
| 1 | Bm1_14965 | hypothetical protein                                                     | R03E1.2        | Lva, Emb, Unclassified, Lvl, Unc,<br>WT, Larval Lethal-Early (L1/L2)                                                                                    |
| 1 | Bm1_00705 | <i>P. falciparum</i> RESA-like protein with<br>DnaJ domain-related       | <i>ssq-2</i>   | Unc, WT                                                                                                                                                 |
| 1 | Bm1_06655 | hypothetical protein                                                     | F08G2.7        | Unclassified, WT                                                                                                                                        |
| 1 | Bm1_19425 | MNN4 protein.-related                                                    | F46C5.6        | Unclassified, WT                                                                                                                                        |
| 1 | Bm1_36080 | hypothetical protein                                                     | <i>sas-4</i>   | Dpy, Spindle Assembly<br>abnormal, Emb, Unc, Rup, Gro                                                                                                   |
| 0 | Bm1_02410 | hypothetical protein                                                     | C33H5.17       | Unclassified, WT                                                                                                                                        |
| 0 | Bm1_13005 | hypothetical protein                                                     | <i>smu-2</i>   | Unclassified, WT                                                                                                                                        |
| 0 | Bm1_43725 | Mov34/MPN/PAD-1 family protein                                           | <i>eif-3.F</i> | Dpy, Emb, Unclassified, Pvl,<br>Bmd, Lva, WT, Stp, Gro                                                                                                  |
| 0 | Bm1_31870 | Surfeit locus protein 5 containing                                       | <i>mdt-22</i>  | Dpy, Slu, Emb, Pvl, Sma, Lva,                                                                                                                           |

|    |           |                                                                                                 |               |                                                                                                                                                                        |
|----|-----------|-------------------------------------------------------------------------------------------------|---------------|------------------------------------------------------------------------------------------------------------------------------------------------------------------------|
|    |           | protein                                                                                         |               | WT, Gro, Stp<br>Led, Sister Chromatid<br>Separation abnormal (Cross-<br>eyed), Emb, Pvl, Ste                                                                           |
| 0  | Bm1_08175 | conserved hypothetical protein                                                                  | <i>cdt-1</i>  | Aldicarb resistant, WT                                                                                                                                                 |
| 0  | Bm1_00430 | hypothetical protein                                                                            | F54D7.7       |                                                                                                                                                                        |
| 0  | Bm1_28625 | Mitochondrial glycoprotein                                                                      | F59A2.3       | Rup, Unc, Gro, WT                                                                                                                                                      |
| 0  | Bm1_28315 | conserved hypothetical protein                                                                  | T16G12.5      | Pvl, Unc, Rup, Stp, Gro, WT                                                                                                                                            |
| 0  | Bm1_32025 | hypothetical protein                                                                            | C54G7.1       | Unclassified, WT                                                                                                                                                       |
| 0  | Bm1_03765 | hypothetical protein                                                                            | C15H9.7       | Unclassified, WT                                                                                                                                                       |
| -1 | Bm1_51735 | Troponin I, putative                                                                            | <i>tnt-4</i>  | WT, Gro                                                                                                                                                                |
| -1 | Bm1_13150 | Barrier-to-autointegration factor 1,<br>putative                                                | <i>baf-1</i>  | Bmd, Emb, Unclassified, Unc,<br>WT                                                                                                                                     |
| -1 | Bm1_27705 | 7B2-related                                                                                     | <i>sbt-1</i>  | Aldicarb resistant, WT                                                                                                                                                 |
| -2 | Bm1_34300 | Nematode cuticle collagen N-<br>terminal domain containing protein                              | <i>dpy-8</i>  | Rol, Dpy, Egl, Unc, Sma, WT                                                                                                                                            |
| -2 | Bm1_22990 | actin-depolymerizing factor 1,<br>putative                                                      | <i>unc-60</i> | Let, Sck, Pvl, Unclassified, Ste,<br>Unc, WT<br>Let, Emb, Unc, Aberrant<br>Cytoplasmic Structures, Lva,<br>aldicarb resistant, Gro, Larval<br>Lethal-Early (L1/L2), WT |
| -2 | Bm1_25910 | RIKEN cDNA 2610002M06, putative<br>Hepatocellular carcinoma-associated<br>antigen 127, putative | F23C8.6       | Egl, Pvl, Unc, WT                                                                                                                                                      |
| -2 | Bm1_25810 | hypothetical protein                                                                            | ZK930.3       | Emb, Pvl, Rup, Stp, Gro, WT                                                                                                                                            |
| -3 | Bm1_33765 | RE35789p-related                                                                                | R08D7.2       | Lva, Emb, Unclassified, WT                                                                                                                                             |
| -3 | Bm1_34145 | PWWP domain containing protein                                                                  | F33D4.7       | Pvl, Stp, WT                                                                                                                                                           |
| -3 | Bm1_14240 | cuticle collagen 2 precursor, putative                                                          | C06A5.3       | Dpy, Bmd, Unc, WT                                                                                                                                                      |
| -3 | Bm1_19990 |                                                                                                 | <i>col-97</i> |                                                                                                                                                                        |
| -3 | Bm1_29435 | Hypothetical protein                                                                            | Y63D3A.8      | Sck, Sma, WT, Stp                                                                                                                                                      |
| -4 | Bm1_33020 | LAMP family protein Imp-1<br>precursor.-related                                                 | <i>imp-1</i>  | Clr, WT                                                                                                                                                                |
| -4 | Bm1_04725 | Helix-loop-helix DNA-binding domain<br>containing protein                                       | <i>hlh-2</i>  | Emb, Pvl, Unc, WT, Stp<br>Bmd, Sister Chromatid<br>Separation abnormal (Cross-<br>eyed), Emb, Pvl, Ste, Rup, Gro                                                       |
| -4 | Bm1_35390 | Slbp protein, putative                                                                          | <i>cdl-1</i>  | Lva, WT                                                                                                                                                                |
| -4 | Bm1_39400 | BED zinc finger family protein                                                                  | F25H8.6       | Sck, Larval Arrest-Early (L1/L2),<br>WT                                                                                                                                |
| -4 | Bm1_07190 | hypothetical protein                                                                            | F41G3.14      | Prz, Emb, Unclassified, Pvl, Lvl,<br>Rup, Unc, Lva, WT, Gro                                                                                                            |
| -5 | Bm1_05435 | conserved hypothetical protein                                                                  | Y54E10A.2     | Unclassified, WT                                                                                                                                                       |
| -5 | Bm1_37515 | hypothetical protein                                                                            | F53A9.4       |                                                                                                                                                                        |
| -5 | Bm1_34195 | Filamin/ABP280 repeat family<br>protein                                                         | C23F12.1      | Mlt, Unc, Rup, WT, Gro                                                                                                                                                 |
| -5 | Bm1_33855 | Ubiquinol-cytochrome C chaperone<br>family protein                                              | C35D10.5      | Emb, Larval Lethal-Early<br>(L1/L2), WT, Gro                                                                                                                           |
| -5 | Bm1_30505 | Neurotransmitter-gated ion-channel<br>transmembrane region family protein                       | F21A3.7       | WT, Stp, Gro                                                                                                                                                           |
| -6 | Bm1_55395 | Conserved hypothetical protein,                                                                 | <i>npp-4</i>  | Pronuclear/Nuclear Appearance                                                                                                                                          |



|     |           |                                                                                 |               |                                                                                          |
|-----|-----------|---------------------------------------------------------------------------------|---------------|------------------------------------------------------------------------------------------|
|     |           | putative                                                                        |               | abnormal, Emb, Unclassified, Pvl, Stp, Gro, WT                                           |
| -6  | Bm1_21970 | conserved hypothetical protein                                                  | Y39A1A.13     | Pvl, Sterile F1, Rup, Unc, Stp, WT                                                       |
| -6  | Bm1_13050 | Hypothetical protein                                                            | Y39B6A.36     | Emb, Rup, Stp, Gro, WT                                                                   |
| -6  | Bm1_03920 | Cytochrome c oxidase subunit IV family protein                                  | W09C5.8       | Lva, Age, Emb, Ste, WT, Gro Sister Chromatid Separation abnormal (Cross-eyed), Emb, WT   |
| -7  | Bm1_06785 | conserved hypothetical protein                                                  | Y71H2B.2      | Lva, Sck, Emb, Lvl, Ste, WT, Larval Lethal-Early (L1/L2)                                 |
| -7  | Bm1_22805 | Hypothetical protein                                                            | <i>snr-5</i>  | Bmd, Chromosome Segregation (karyomeres) abnormal, Emb, WT, Gro                          |
| -7  | Bm1_02630 | hypothetical protein                                                            | C06A8.5       | Emb, WT                                                                                  |
| -7  | Bm1_17210 | conserved hypothetical protein                                                  | R05D11.9      | Age, Clr, Emb, Unclassified, Lpd, Ste, Lva, Gro, WT                                      |
| -8  | Bm1_29430 | Cytochrome c oxidase polypeptide Vb, mitochondrial precursor.-related           | <i>cco-1</i>  | Osmotic Integrity defective, Emb, Pvl, Passage Through Meiosis defective, Stp            |
| -9  | Bm1_10835 | hypothetical protein                                                            | C09H10.7      |                                                                                          |
| -9  | Bm1_31055 | RNA recognition motif containing protein, putative                              | K07H8.10      | Emb, WT, Gro                                                                             |
| -9  | Bm1_44000 | NADH-ubiquinone oxidoreductase ASH1 subunit, mitochondrial precursor, putative  | Y51H1A.3      | Emb, Unclassified, WT                                                                    |
| -9  | Bm1_41915 | NADH-ubiquinone oxidoreductase 18 kDa subunit, mitochondrial precursor.-related | <i>lpd-5</i>  | Lva, Emb, WT                                                                             |
| -9  | Bm1_16675 | hypothetical protein                                                            | F26E4.4       | Lva, Emb, Larval Arrest-Early (L1/L2), WT                                                |
| -9  | Bm1_36460 | hypothetical protein                                                            | Y51H4A.15     | Lva, Pch, Slu, Emb, Unclassified, WT, Gro                                                |
| -10 | Bm1_52475 | hypothetical protein                                                            | T01C3.1       | Emb, Pvl, Rup, Unc, Sma, Sck, Gro, WT                                                    |
| -10 | Bm1_01075 | CG15780-PA-related                                                              | Y73B3A.17     | Larval Arrest-Late (L3/L4), WT                                                           |
| -10 | Bm1_07885 | SD09147p-related                                                                | F25H5.6       | Lva, Unclassified, Gro, WT                                                               |
| -10 | Bm1_40540 | conserved hypothetical protein                                                  | C39E9.11      | Emb, Unc, WT                                                                             |
| -11 | Bm1_42620 | DNA segment, Chr 7, Wayne State University 180, expressed, putative             | <i>crn-5</i>  | Lva, Pch, Larval Arrest-Early (L1/L2), WT, Gro                                           |
| -11 | Bm1_33770 | zgc:92910-related                                                               | ZK265.6       | Lva, Larval Arrest-Early (L1/L2), Unclassified, Pvl, Larval Arrest-Late (L3/L4), WT, Gro |
| -11 | Bm1_36075 | D10Ert718e protein-related                                                      | F10E9.11      | Spindle Assembly abnormal, Emb, WT                                                       |
| -12 | Bm1_49670 | zgc:101594-related                                                              | Y47G6A.9      | Lva, Clr, Pvl, Rup, WT, Stp, Gro                                                         |
| -12 | Bm1_48075 | M-phase phosphoprotein 6.-related                                               | F29A7.6       | Lva, Pch, Pvl, WT, Stp, Gro                                                              |
| -12 | Bm1_04435 | Hypothetical protein                                                            | <i>vha-15</i> | Prz, Bli, Lva, Emb, Lvl, WT                                                              |

|     |           |                                                                                                      |                 |                                                                                                                        |
|-----|-----------|------------------------------------------------------------------------------------------------------|-----------------|------------------------------------------------------------------------------------------------------------------------|
| -12 | Bm1_55635 | hypothetical protein                                                                                 | <i>mdf-1</i>    | Pvl, Unc<br>Egl, Emb, Lvl, Rup, Unc, Bmd,<br>Lva, Larval Lethal-Early (L1/L2),<br>WT                                   |
| -13 | Bm1_57435 | ELM2 domain containing protein                                                                       | <i>egl-27</i>   |                                                                                                                        |
| -13 | Bm1_14750 | Ubiquinol-cytochrome C reductase<br>hinge protein                                                    | T27E9.2         | Gro, WT                                                                                                                |
| -13 | Bm1_34560 | CGI-115 protein-related<br>Probable dolichol-phosphate<br>mannosyltransferase subunit 3,<br>putative | F53E10.6        | WT, Gro                                                                                                                |
| -13 | Bm1_46380 |                                                                                                      | F28D1.11        | Sck, Sma, WT, Stp<br>Egl, Pch, Ste, Gon, Lva, Gro,<br>Stp, WT                                                          |
| -14 | Bm1_46795 | protein T01B7.5, putative                                                                            | T01B7.5         | Lva, Emb, Larval Lethal-Early<br>(L1/L2), WT, Gro                                                                      |
| -14 | Bm1_46160 | Conserved hypothetical protein,<br>putative                                                          | D2007.4         |                                                                                                                        |
| -14 | Bm1_49750 | ORF; putative                                                                                        | Y47H9C.7        | Dpy, Lva, Emb, WT, Gro                                                                                                 |
| -15 | Bm1_47525 | LD18634p-related                                                                                     | <i>egl-46</i>   | Sck, Lvl, WT, Gro                                                                                                      |
| -15 | Bm1_12585 | small heat shock protein 12.6,<br>putative                                                           | <i>hsp-12.2</i> | Sterile F0/Fertility Problems, WT                                                                                      |
| -15 | Bm1_37955 | hypothetical protein                                                                                 | ZK792.5         | Unclassified, Stp, WT                                                                                                  |
| -15 | Bm1_18760 | conserved hypothetical protein                                                                       | C56A3.4         | WT, Gro                                                                                                                |
| -15 | Bm1_02155 | Delta5 fatty acid desaturase-related                                                                 | <i>fat-3</i>    | Dpy, Unc, WT, Gro<br>Larval Arrest-Early (L1/L2), Gro,<br>WT                                                           |
| -16 | Bm1_01935 | Hypothetical protein                                                                                 | Y43F8C.8        |                                                                                                                        |
| -16 | Bm1_03840 | Hypothetical protein                                                                                 | Y40B1B.7        | Emb, Gro, WT, Stp                                                                                                      |
| -17 | Bm1_37810 | GGL domain containing protein                                                                        | <i>gpc-2</i>    | Pnm, Emb, WT<br>Emb, Larval Arrest-Early (L1/L2),<br>Unclassified, Larval Arrest-Late<br>(L3/L4), WT, Stp, Gro         |
| -17 | Bm1_16340 | hypothetical protein                                                                                 | K04G7.1         | Osmotic Integrity defective,<br>Emb, Sterile F0/Fertility<br>Problems, Ste, Sterility/Impaired<br>Fertility in F0, WT  |
| -17 | Bm1_27220 | hypothetical protein                                                                                 | <i>pqn-45</i>   |                                                                                                                        |
| -18 | Bm1_14345 | Helix-loop-helix DNA-binding domain<br>containing protein                                            | <i>hnd-1</i>    | Bmd, WT                                                                                                                |
| -18 | Bm1_48760 | putative transcription factor                                                                        | <i>tag-313</i>  | Unclassified, WT, Gro                                                                                                  |
| -18 | Bm1_37370 | conserved hypothetical protein                                                                       | <i>unc-44</i>   | Dpy, Slu, Unc, Sma, Gro, WT                                                                                            |
| -18 | Bm1_02675 | GYF domain containing protein                                                                        | R10D12.14       | Emb, WT                                                                                                                |
| -18 | Bm1_02520 | 1300013D05Rik protein-related                                                                        | F52C9.7         | Dpy, Sle, Emb, WT                                                                                                      |
| -18 | Bm1_56915 | conserved hypothetical protein                                                                       | Y51A2D.7        | Emb, Ste, Unc, WT, Gro<br>Egl, Emb, Lva, Larval Arrest-<br>Early (L1/L2), Stp, WT, Gro,<br>Larval Lethal-Early (L1/L2) |
| -19 | Bm1_41180 | Conserved hypothetical protein,<br>putative                                                          | ZK1098.7        |                                                                                                                        |

|     |           |                                                                                   |                |                                                                                                                    |
|-----|-----------|-----------------------------------------------------------------------------------|----------------|--------------------------------------------------------------------------------------------------------------------|
| -19 | Bm1_10195 | Hypothetical protein                                                              | C24H12.5       | Bmd, Lvl, Unc, WT                                                                                                  |
| -19 | Bm1_37250 | RNA recognition motif.<br>Conserved hypothetical protein,<br>putative             | F11A10.7       | Lva, Emb, WT<br>Pch, Slu, Emb, Unclassified, Lvl,<br>Unc, Gro, WT                                                  |
| -20 | Bm1_41995 | Helix-loop-helix DNA-binding domain<br>containing protein                         | <i>rsp-7</i>   |                                                                                                                    |
| -20 | Bm1_44295 |                                                                                   | <i>hlh-1</i>   | Emb, Unc, WT                                                                                                       |
| -20 | Bm1_48330 | Dihydrofolate reductase.-related                                                  | C36B1.7        | Emb, WT<br>Egl, Sle, Ste, Lva, Larval Arrest-<br>Early (L1/L2), Gro, Stp, Larval<br>Lethal-Early (L1/L2), WT       |
| -20 | Bm1_45185 | putative RNA binding protein                                                      | T04A8.6        |                                                                                                                    |
| -21 | Bm1_44035 | hypothetical protein                                                              | C50B6.2        | Emb, Unc, WT                                                                                                       |
| -21 | Bm1_28490 | conserved hypothetical protein                                                    | F25H5.5        | Emb, WT                                                                                                            |
| -22 | Bm1_26345 | Hypothetical protein                                                              | <i>tag-307</i> | Age, Unclassified, WT                                                                                              |
| -22 | Bm1_09495 | conserved hypothetical protein                                                    | F30F8.9        | Emb, WT<br>Emb, Unclassified, Larval Arrest-<br>Late (L3/L4), Unc, Rup, Lva, Adl,<br>WT, Gro, Stp                  |
| -22 | Bm1_17305 | Hypothetical protein                                                              | <i>ntl-2</i>   |                                                                                                                    |
| -22 | Bm1_25285 | Prion-like--related<br>Hyaluronan / mRNA binding family<br>protein                | <i>pqn-13</i>  | Aldicarb resistant, WT                                                                                             |
| -22 | Bm1_17120 |                                                                                   | <i>vig-1</i>   | Emb, WT<br>General Pace of Development<br>abnormal, Emb, Mlt,<br>Unclassified, Lvl, Sma, Unc, Lva,<br>Adl, WT, Gro |
| -22 | Bm1_54140 | GH14561p-related                                                                  | T27F7.1        |                                                                                                                    |
| -23 | Bm1_19655 | Hypothetical protein                                                              | F54C4.1        | Lva, Emb, Gro, WT                                                                                                  |
| -23 | Bm1_42395 | Nematode cuticle collagen N-<br>terminal domain containing protein                | <i>col-137</i> | Unclassified, Gro, WT                                                                                              |
| -23 | Bm1_32145 | Cuticle collagen dpy-7 precursor,<br>putative                                     | <i>dpy-8</i>   | Rol, Dpy, Egl, Unc, Sma, WT                                                                                        |
| -23 | Bm1_31210 | Zinc finger, C2H2 type family protein                                             | <i>lir-1</i>   | Emb, Mlt, Lvl, Unc, WT<br>Clr, Pch, Prl, Emb, Lvl, Pvl, Ste,<br>Rup, Unc, Bmd, Lva, Sck, Gro,<br>WT, Stp           |
| -23 | Bm1_27030 | Talin 1, putative                                                                 | Y71G12B.11     |                                                                                                                    |
| -23 | Bm1_27570 | ARID/BRIGHT DNA binding domain<br>containing protein<br>UPF0279 protein C14orf129 | C01G8.9        | Let, Emb, Lvl, Ste, Rup, Bmd,<br>Led, WT, Gro                                                                      |
| -24 | Bm1_26605 | homolog.-related                                                                  | T24H7.3        | Emb, WT                                                                                                            |
| -24 | Bm1_46495 | Zinc finger, C2H2 type family protein                                             | <i>lin-13</i>  | Bmd, Sterile F1, WT                                                                                                |
| -25 | Bm1_04785 | AN1-like Zinc finger family protein                                               | F56F3.4        | Unclassified, WT                                                                                                   |
| -25 | Bm1_01560 | conserved hypothetical protein                                                    | <i>dgn-1</i>   | Unclassified, WT                                                                                                   |
| -25 | Bm1_49645 | Microcephalin., putative                                                          | W04A8.1        | Lvl, WT                                                                                                            |
| -25 | Bm1_45665 | Mediator protein 11-related<br>Hypothetical 19.4 kDa protein                      | <i>mdt-11</i>  | Dpy, Lva, Emb, WT                                                                                                  |
| -26 | Bm1_30230 | ZC395.10 in chromosome III.-related                                               | ZC395.10       | Emb, Ste, WT                                                                                                       |

|     |           |                                                                                                 |                |                                                                                     |
|-----|-----------|-------------------------------------------------------------------------------------------------|----------------|-------------------------------------------------------------------------------------|
| -26 | Bm1_45060 | hypothetical protein                                                                            | Y53G8AM.8      | Emb, WT                                                                             |
| -26 | Bm1_15510 | RE18450p, putative<br>Muscle positioning protein 4,<br>putative                                 | M04B2.4        | Gro, WT<br>Prz, Lva, Sck, Ste, Adl, WT,<br>Larval Lethal-Early (L1/L2)              |
| -26 | Bm1_05930 |                                                                                                 | <i>mup-4</i>   |                                                                                     |
| -27 | Bm1_47605 | CUB domain containing protein                                                                   | <i>sol-1</i>   | Unclassified, WT                                                                    |
| -27 | Bm1_00645 | Transmembrane cell adhesion<br>receptor mua-3 precursor, putative                               | <i>mup-4</i>   | Prz, Lva, Sck, Ste, Adl, WT,<br>Larval Lethal-Early (L1/L2)                         |
| -27 | Bm1_43030 | protein C18H9.7 , putative                                                                      | <i>rpy-1</i>   | Unclassified, WT                                                                    |
| -27 | Bm1_56230 | GH25683p, putative<br>M-phase phosphoprotein, mpp8,<br>putative                                 | Y57A10A.10     | Unclassified, WT                                                                    |
| -27 | Bm1_34260 |                                                                                                 | T09A5.8        | Emb, WT                                                                             |
| -28 | Bm1_41220 | Helix-loop-helix DNA-binding domain<br>containing protein                                       | <i>hlh-4</i>   | Pvl, Gro, WT                                                                        |
| -28 | Bm1_34445 | zgc:91831-related                                                                               | K01G5.8        | Unclassified, Gro, WT                                                               |
| -28 | Bm1_39315 | Zinc finger, C2H2 type family protein                                                           | Y56A3A.18      | Complex Phenotype, Lva, Emb,<br>Stp, Gro, WT                                        |
| -29 | Bm1_33410 | CG32584-PB-related                                                                              | ZK1248.11      | Unclassified, WT                                                                    |
| -30 | Bm1_11825 | hypothetical protein<br>Surfeit locus protein 6 containing<br>protein                           | F43D9.1        | Dpy, Lva, Emb, Unclassified, WT<br>Lva, Sck, Larval Arrest-Late<br>(L3/L4), WT, Gro |
| -30 | Bm1_15840 |                                                                                                 | ZK546.14       |                                                                                     |
| -30 | Bm1_13965 | M-phase phosphoprotein-related<br>Fibronectin type III domain<br>containing protein             | F54H5.3        | Unclassified, WT                                                                    |
| -30 | Bm1_57145 |                                                                                                 | <i>let-805</i> | Prz, Sck, Emb, Lvl, Adl, Ste, WT                                                    |
| -30 | Bm1_17070 | Leucine Rich Repeat family protein<br>Suppressor of lurcher protein 1<br>precursor, putative    | <i>pan-1</i>   | Lva, Clr, Lvl, Unc, WT                                                              |
| -31 | Bm1_47600 |                                                                                                 | <i>sol-1</i>   | Unclassified, WT                                                                    |
| -31 | Bm1_19390 | Hypothetical protein<br>ARID/BRIGHT DNA binding domain<br>containing protein                    | <i>daf-12</i>  | Lon, Unclassified, WT<br>Let, Emb, Lvl, Ste, Rup, Bmd,<br>Led, WT, Gro              |
| -32 | Bm1_56290 | C2-HC type zinc finger protein C.e-<br>MyT1, putative                                           | C01G8.9        |                                                                                     |
| -32 | Bm1_11340 |                                                                                                 | <i>ekl-2</i>   | Emb, Unc, WT                                                                        |
| -32 | Bm1_38435 | Conserved hypothetical protein,<br>putative                                                     | <i>tag-60</i>  | Aldicarb resistant, WT                                                              |
| -33 | Bm1_03370 | LD15209p, putative                                                                              | C13F10.7       | Emb, WT                                                                             |
| -33 | Bm1_28035 | Hypothetical protein<br>Ulp1 protease family, C-terminal<br>catalytic domain containing protein | R05D11.7       | Egl, Gro, WT<br>Dpy, aldicarb resistant, Egl, Pch,<br>WT, Gro                       |
| -33 | Bm1_23370 |                                                                                                 | <i>ulp-4</i>   |                                                                                     |
| -33 | Bm1_47300 | conserved hypothetical protein<br>Protein phosphatase inhibitor<br>containing protein           | <i>daf-7</i>   | Aldicarb resistant, WT                                                              |
| -33 | Bm1_06640 |                                                                                                 | C07H6.2        | Gro, WT                                                                             |
| -33 | Bm1_33205 | Protein cab-1.-related<br>Lectin C-type domain containing<br>protein                            | <i>cab-1</i>   | Aldicarb resistant, WT                                                              |
| -34 | Bm1_27455 |                                                                                                 | T19E7.1        | Emb, Unclassified, WT                                                               |
| -34 | Bm1_22440 | Homeobox protein gooseoid,<br>putative                                                          | <i>ceh-45</i>  | Emb, WT                                                                             |

|     |           |                                                                                            |               |                                                                    |
|-----|-----------|--------------------------------------------------------------------------------------------|---------------|--------------------------------------------------------------------|
| -35 | Bm1_52815 | conserved hypothetical protein                                                             | F45F2.10      | Ste, WT, Stp                                                       |
| -36 | Bm1_06130 | Nuclear anchorage protein 1-related                                                        | <i>anc-1</i>  | Mlt, Lvl, Gro, WT                                                  |
| -36 | Bm1_06130 | Nuclear anchorage protein 1-related                                                        | <i>anc-1</i>  | Mlt, Lvl, Gro, WT                                                  |
| -37 | Bm1_29715 | Hypothetical protein<br>Serine/threonine protein<br>phosphatase PP1 isozyme 1,<br>putative | <i>lin-52</i> | Lva, Egl, WT, Stp                                                  |
| -37 | Bm1_18195 | putative                                                                                   | C24H11.2      | Aldicarb resistant, WT                                             |
| -37 | Bm1_37240 | ephrin EFN-4, putative                                                                     | <i>efn-2</i>  | Unclassified, WT                                                   |
| -38 | Bm1_21825 | hypothetical protein                                                                       | W03A5.4       | Spindle Elongation/Integrity<br>abnormal, Unclassified, WT         |
| -38 | Bm1_56600 | cystatin-type cysteine proteinase<br>inhibitor CPI-2, putative                             | <i>cli-1</i>  | Ste, WT                                                            |
| -39 | Bm1_55355 | Protein FAM34A.-related                                                                    | <i>acl-14</i> | Emb, WT                                                            |
| -39 | Bm1_21530 | hypothetical protein                                                                       | R11H6.5       | Unclassified, WT                                                   |
| -39 | Bm1_47345 | 3 exoribonuclease family, domain 2<br>containing protein                                   | F37C12.13     | Lva, Emb, Larval Arrest-Early<br>(L1/L2), Sterile F1, Ste, WT, Gro |
| -39 | Bm1_38400 | Conserved hypothetical protein,<br>putative                                                | Y37D8A.21     | Lva, WT                                                            |
| -39 | Bm1_13715 | Fras1 protein-related                                                                      | C48E7.6       | Emb, WT                                                            |
| -39 | Bm1_01555 | hypothetical protein                                                                       | <i>dgn-1</i>  | Unclassified, WT                                                   |
| -40 | Bm1_56045 | myosin-like protein, putative                                                              | <i>anc-1</i>  | Mlt, Lvl, Gro, WT                                                  |
| -40 | Bm1_17360 | conserved hypothetical protein<br>Phospholipase c like protein 1,<br>isoform b, putative   | F25C8.3       | Slu, WT                                                            |
| -41 | Bm1_11715 | putative                                                                                   | <i>pll-1</i>  | Pnm, Larval Arrest-Late (L3/L4),<br>WT                             |
| -42 | Bm1_20785 | hypothetical protein                                                                       | <i>ssl-1</i>  | Emb, WT                                                            |
| -42 | Bm1_16705 | conserved hypothetical protein                                                             | F37C12.2      | Lva, Emb, WT                                                       |
| -42 | Bm1_02455 | WW domain containing protein                                                               | F13E6.4       | Pvl, WT                                                            |
| -42 | Bm1_05345 | WD-repeat protein 3.-related                                                               | F13H8.2       | Larval Arrest-Early (L1/L2), Gro,<br>WT                            |
| -43 | Bm1_46675 | membrane-associated RING-CH<br>protein III, putative                                       | Y57A10B.1     | Unclassified, WT                                                   |
| -43 | Bm1_43275 | membrane-associated RING-CH<br>protein III, putative                                       | C17E4.3       | Emb, WT                                                            |
| -43 | Bm1_12300 | Fibronectin type III domain<br>containing protein                                          | <i>ptp-3</i>  | Emb, Morphology defect, WT                                         |
| -45 | Bm1_23135 | Hypothetical protein                                                                       | <i>acy-3</i>  | Unclassified, WT                                                   |
| -46 | Bm1_20840 | calcium-binding protein, putative                                                          | F59D6.7       | Unc, WT                                                            |
| -47 | Bm1_26685 | F25C8.3 protein-related                                                                    | F25C8.3       | Slu, WT                                                            |
| -50 | Bm1_54070 | F25C8.3 protein-related                                                                    | F25C8.3       | Slu, WT                                                            |
| -51 | Bm1_02325 | Immunoglobulin I-set domain<br>containing protein                                          | <i>ketn-1</i> | Aldicarb resistant, Gro, WT                                        |
| -52 | Bm1_04865 | DNA polymerase epsilon p17<br>subunit, putative                                            | T26A5.8       | Pnm, Emb, WT                                                       |

Previously identified targets are shown with bold identifiers. Manually added annotations are shown in italics. *B. malayi* pub locus and descriptions are from

Ghedin *et al.* [11]. *C. elegans* gene names and RNAi phenotypes are from Wormbase.
