# Supplementary material for: Mining Predicted Essential Genes of Brugia malayi for Nematode Drug Targets
Source: PubMed Central journal article supplement (PMC2063515; doi:10.1371/journal.pone.0001189), 2007-11-14
Supplement: pone.0001189.s004.pdf [file pone.0001189.s004.pdf]

**Supplementary Table S4. GO terms associated with target pool sequences.**

| <b>GO Category/Term</b>                         | <b>All Genes</b> |          | <b>Target Pool</b> |          |
|-------------------------------------------------|------------------|----------|--------------------|----------|
|                                                 | <b>count</b>     | <b>%</b> | <b>count</b>       | <b>%</b> |
| <b>Biological Process</b>                       |                  |          |                    |          |
| GO:0008150 biological_process                   | 2572             | 33.1%    | 75                 | 33.8%    |
| GO:0008152 metabolism                           | 1817             | 23.4%    | 37                 | 16.7%    |
| GO:0006810 transport                            | 443              | 5.7%     | 33                 | 14.9%    |
| GO:0006811 ion transport                        | 233              | 3.0%     | 30                 | 13.5%    |
| GO:0050794 regulation of cellular process       | 314              | 4.0%     | 11                 | 5.0%     |
| GO:0006350 transcription                        | 300              | 3.9%     | 9                  | 4.1%     |
| GO:0019538 protein metabolism                   | 798              | 10.3%    | 6                  | 2.7%     |
| GO:0007154 cell communication                   | 239              | 3.1%     | 6                  | 2.7%     |
| GO:0007165 signal transduction                  | 235              | 3.0%     | 5                  | 2.3%     |
| GO:0006629 lipid metabolism                     | 71               | 0.9%     | 2                  | 0.9%     |
| GO:0015031 protein transport                    | 68               | 0.9%     | 2                  | 0.9%     |
| GO:0007049 cell cycle                           | 45               | 0.6%     | 2                  | 0.9%     |
| GO:0006259 DNA metabolism                       | 117              | 1.5%     | 1                  | 0.5%     |
| GO:0007275 multicellular organismal development | 28               | 0.4%     | 1                  | 0.5%     |
| GO:0030154 cell differentiation                 | 20               | 0.3%     | 1                  | 0.5%     |
| GO:0016265 death                                | 15               | 0.2%     | 1                  | 0.5%     |
| GO:0006464 protein modification                 | 375              | 4.8%     | 0                  | 0.0%     |
| GO:0050896 response to stimulus                 | 52               | 0.7%     | 0                  | 0.0%     |
| GO:0006950 response to stress                   | 36               | 0.5%     | 0                  | 0.0%     |
| <b>Cellular Component</b>                       | <b>count</b>     | <b>%</b> | <b>count</b>       | <b>%</b> |
| GO:0005575 cellular_component                   | 1691             | 25.5%    | 90                 | 24.3%    |
| GO:0005623 cell                                 | 1640             | 24.8%    | 88                 | 23.7%    |
| GO:0005622 intracellular                        | 1147             | 17.3%    | 65                 | 17.5%    |
| GO:0043226 organelle                            | 854              | 12.9%    | 41                 | 11.1%    |
| GO:0005737 cytoplasm                            | 349              | 5.3%     | 35                 | 9.4%     |
| GO:0005634 nucleus                              | 582              | 8.8%     | 24                 | 6.5%     |
| GO:0005739 mitochondrion                        | 31               | 0.5%     | 10                 | 2.7%     |
| GO:0005886 plasma membrane                      | 36               | 0.5%     | 8                  | 2.2%     |
| GO:0005840 ribosome                             | 101              | 1.5%     | 3                  | 0.8%     |
| GO:0005856 cytoskeleton                         | 59               | 0.9%     | 2                  | 0.5%     |
| GO:0005777 peroxisome                           | 3                | 0.0%     | 2                  | 0.5%     |
| GO:0016023 cytoplasmic membrane-bound vesicle   | 23               | 0.3%     | 1                  | 0.3%     |
| GO:0005654 nucleoplasm                          | 20               | 0.3%     | 1                  | 0.3%     |
| GO:0005815 microtubule organizing center        | 2                | 0.0%     | 1                  | 0.3%     |
| GO:0005783 endoplasmic reticulum                | 25               | 0.4%     | 0                  | 0.0%     |
| GO:0005730 nucleolus                            | 23               | 0.3%     | 0                  | 0.0%     |
| GO:0005794 Golgi apparatus                      | 19               | 0.3%     | 0                  | 0.0%     |
| GO:0005829 cytosol                              | 12               | 0.2%     | 0                  | 0.0%     |
| GO:0005773 vacuole                              | 2                | 0.0%     | 0                  | 0.0%     |
| GO:0005764 lysosome                             | 1                | 0.0%     | 0                  | 0.0%     |
| <b>Molecular Function</b>                       | <b>count</b>     | <b>%</b> | <b>count</b>       | <b>%</b> |
| GO:0003674 molecular_function                   | 3348             | 27.4%    | 112                | 34.1%    |
| GO:0005488 binding                              | 1998             | 16.3%    | 49                 | 14.9%    |
| GO:0003676 nucleic acid binding                 | 882              | 7.2%     | 25                 | 7.6%     |
| GO:0003824 catalytic activity                   | 1447             | 11.8%    | 24                 | 7.3%     |
| GO:0005198 structural molecule activity         | 192              | 1.6%     | 24                 | 7.3%     |
| GO:0005215 transporter activity                 | 221              | 1.8%     | 16                 | 4.9%     |
| GO:0016787 hydrolase activity                   | 518              | 4.2%     | 13                 | 4.0%     |
| GO:0005515 protein binding                      | 284              | 2.3%     | 12                 | 3.7%     |
| GO:0003677 DNA binding                          | 356              | 2.9%     | 9                  | 2.7%     |

|                                                              |     |      |   |      |
|--------------------------------------------------------------|-----|------|---|------|
| GO:0030528 transcription regulator activity                  | 224 | 1.8% | 8 | 2.4% |
| GO:0030234 enzyme regulator activity                         | 62  | 0.5% | 5 | 1.5% |
| GO:0004871 signal transducer activity                        | 140 | 1.1% | 4 | 1.2% |
| GO:0008233 peptidase activity (peptidase activity)           | 175 | 1.4% | 3 | 0.9% |
| GO:0003700 transcription factor activity                     | 138 | 1.1% | 3 | 0.9% |
| GO:0004872 receptor activity                                 | 108 | 0.9% | 3 | 0.9% |
| GO:0030246 carbohydrate binding                              | 22  | 0.2% | 3 | 0.9% |
| GO:0016740 transferase activity                              | 460 | 3.8% | 2 | 0.6% |
| GO:0003723 RNA binding                                       | 80  | 0.7% | 2 | 0.6% |
| GO:0008289 lipid binding                                     | 30  | 0.2% | 2 | 0.6% |
| GO:0008092 cytoskeletal protein binding                      | 23  | 0.2% | 2 | 0.6% |
| GO:0003779 actin binding                                     | 16  | 0.1% | 2 | 0.6% |
| GO:0009055 electron carrier activity                         | 9   | 0.1% | 2 | 0.6% |
| GO:0005509 calcium ion binding                               | 78  | 0.6% | 1 | 0.3% |
| GO:0004518 nuclease activity                                 | 41  | 0.3% | 1 | 0.3% |
| GO:0003682 chromatin binding                                 | 10  | 0.1% | 1 | 0.3% |
| GO:0000166 nucleotide binding                                | 659 | 5.4% | 0 | 0.0% |
| GO:0016301 kinase activity                                   | 268 | 2.2% | 0 | 0.0% |
| GO:0004672 protein kinase activity                           | 222 | 1.8% | 0 | 0.0% |
| GO:0005216 ion channel activity                              | 65  | 0.5% | 0 | 0.0% |
| GO:0004721 phosphoprotein phosphatase activity               | 45  | 0.4% | 0 | 0.0% |
| GO:0003774 motor activity                                    | 33  | 0.3% | 0 | 0.0% |
| GO:0008135 translation factor activity, nucleic acid binding | 23  | 0.2% | 0 | 0.0% |
| GO:0045182 translation regulator activity                    | 23  | 0.2% | 0 | 0.0% |
| GO:0005102 receptor binding                                  | 16  | 0.1% | 0 | 0.0% |
| GO:0016209 antioxidant activity                              | 9   | 0.1% | 0 | 0.0% |
| GO:0005326 neurotransmitter transporter activity             | 4   | 0.0% | 0 | 0.0% |

The GO terms are a subset of the GO hierarchy (GO slim). All children of the GO slim nodes are mapped up to the nearest parent in the slim hierarchy. Counts total the occurrences of the exact GO term listed and all its children.
