# Supplementary material for: Mining Predicted Essential Genes of Brugia malayi for Nematode Drug Targets
Source: PLOS journal article supplement (doi:10.1371/journal.pone.0001189), 2007-11-13
Supplement: S5 (10.1371/journal.pone.0001189.s005) [file journal.pone.0001189.s005]

**Supplementary Table S5. RNAi phenotype components of each binning category.**

| <b>RNAi Phenotype</b>                             | <b>Binning Category</b> |
|---------------------------------------------------|-------------------------|
| Aberrant Cytoplasmic Structures                   | Embryonic Lethal/Arrest |
| Abs                                               | Embryonic Lethal/Arrest |
| Asymmetry of Division abnormal                    | Embryonic Lethal/Arrest |
| Centrosome Attachment abnormal                    | Embryonic Lethal/Arrest |
| Chromosome Segregation (karyomeres) abnormal      | Embryonic Lethal/Arrest |
| Complex Phenotype                                 | Embryonic Lethal/Arrest |
| Cortical Dynamics abnormal                        | Embryonic Lethal/Arrest |
| Cpa                                               | Embryonic Lethal/Arrest |
| Cyk                                               | Embryonic Lethal/Arrest |
| Emb                                               | Embryonic Lethal/Arrest |
| Etv                                               | Embryonic Lethal/Arrest |
| Integrity of Membranous Organelles defective      | Embryonic Lethal/Arrest |
| Led                                               | Embryonic Lethal/Arrest |
| Let                                               | Embryonic Lethal/Arrest |
| Lethal                                            | Embryonic Lethal/Arrest |
| Mul                                               | Embryonic Lethal/Arrest |
| Nmo                                               | Embryonic Lethal/Arrest |
| Npo                                               | Embryonic Lethal/Arrest |
| Nuclear Appearance abnormal                       | Embryonic Lethal/Arrest |
| Ocs                                               | Embryonic Lethal/Arrest |
| Oma                                               | Embryonic Lethal/Arrest |
| Osmotic Integrity defective                       | Embryonic Lethal/Arrest |
| Oth                                               | Embryonic Lethal/Arrest |
| Passage Through Meiosis defective                 | Embryonic Lethal/Arrest |
| Pat                                               | Embryonic Lethal/Arrest |
| Pna                                               | Embryonic Lethal/Arrest |
| Pnm                                               | Embryonic Lethal/Arrest |
| Pronuclear/Nuclear Appearance abnormal            | Embryonic Lethal/Arrest |
| Rot                                               | Embryonic Lethal/Arrest |
| Severe Pleiotropic Defects                        | Embryonic Lethal/Arrest |
| Sister Chromatid Separation abnormal (Cross-eyed) | Embryonic Lethal/Arrest |
| Sle                                               | Embryonic Lethal/Arrest |
| Spd                                               | Embryonic Lethal/Arrest |
| Spindle Assembly abnormal                         | Embryonic Lethal/Arrest |
| Spindle Elongation/Integrity abnormal             | Embryonic Lethal/Arrest |
| Spn                                               | Embryonic Lethal/Arrest |
| Spo                                               | Embryonic Lethal/Arrest |
| Age                                               | Growth Defect           |
| Daf                                               | Growth Defect           |

|                                      |                            |
|--------------------------------------|----------------------------|
| Developmental Delay                  | Growth Defect              |
| General Pace of Development abnormal | Growth Defect              |
| Gro                                  | Growth Defect              |
| Mab                                  | Growth Defect              |
| Mlt                                  | Growth Defect              |
| Sck                                  | Growth Defect              |
| Adl                                  | Larval/Adult Lethal/Arrest |
| Larval Arrest-Early (L1/L2)          | Larval/Adult Lethal/Arrest |
| Larval Arrest-Late (L3/L4)           | Larval/Adult Lethal/Arrest |
| Larval Lethal-Early (L1/L2)          | Larval/Adult Lethal/Arrest |
| Larval Lethal-Late (L3/L4)           | Larval/Adult Lethal/Arrest |
| Lva                                  | Larval/Adult Lethal/Arrest |
| Lvl                                  | Larval/Adult Lethal/Arrest |
| Bli                                  | Morphology Defect          |
| Bmd                                  | Morphology Defect          |
| Clr                                  | Morphology Defect          |
| Dpy                                  | Morphology Defect          |
| Lon                                  | Morphology Defect          |
| Morphology defect                    | Morphology Defect          |
| Pch                                  | Morphology Defect          |
| Rol                                  | Morphology Defect          |
| Rup                                  | Morphology Defect          |
| Sma                                  | Morphology Defect          |
| Hya                                  | Movement Defect            |
| Prl                                  | Movement Defect            |
| Prz                                  | Movement Defect            |
| Slu                                  | Movement Defect            |
| Unc                                  | Movement Defect            |
| Ced                                  | Other                      |
| Esp                                  | Other                      |
| Fem                                  | Other                      |
| Fog                                  | Other                      |
| Him                                  | Other                      |
| Lin                                  | Other                      |
| Lpd                                  | Other                      |
| Mec                                  | Other                      |
| Mut                                  | Other                      |
| Rde                                  | Other                      |
| Unclassified                         | Other                      |
| Abnormal coloration                  | Other                      |
| aldicarb_resistant                   | Other                      |

|                                    |                          |
|------------------------------------|--------------------------|
| Egg Size abnormal                  | Other                    |
| Entry Into Interphase abnormal     | Other                    |
| Pace of P-Lineage abnormal         | Other                    |
| Pro                                | Other                    |
| Stress Resistance                  | Other                    |
| Fgc                                | Sterility                |
| Glp                                | Sterility                |
| Gon                                | Sterility                |
| Lag                                | Sterility                |
| Mei                                | Sterility                |
| Mel                                | Sterility                |
| Mig                                | Sterility                |
| Ooc                                | Sterility                |
| Reproductive defect                | Sterility                |
| Ste                                | Sterility                |
| Sterile F0/Fertility Problems      | Sterility                |
| Sterile F1                         | Sterility                |
| Sterility/Impaired Fertility in F0 | Sterility                |
| Stp                                | Sterility                |
| Tum                                | Sterility                |
| Abnormal coloration                | Unclassified             |
| aldicarb_resistant                 | Unclassified             |
| Egg Size abnormal                  | Unclassified             |
| Entry Into Interphase abnormal     | Unclassified             |
| Pace of P-Lineage abnormal         | Unclassified             |
| Pro                                | Unclassified             |
| Stress Resistance                  | Unclassified             |
| Egl                                | Vulval/Egg Laying Defect |
| Evl                                | Vulval/Egg Laying Defect |
| Muv                                | Vulval/Egg Laying Defect |
| Pvl                                | Vulval/Egg Laying Defect |
| Pvu                                | Vulval/Egg Laying Defect |
| Vul                                | Vulval/Egg Laying Defect |
